# Supplementary material for: Construction of highly fluorescent N–O seven-membered heterocycles via thermo-oxidation of oxazolidines
Source: Royal Society of Chemistry journal article supplement (doi:10.1039/c9tc01199d), 2019-01-01
Supplement: c9tc01199d1.pdf [file c9tc01199d1.pdf]

## Supporting Information

### **Construction of highly fluorescent N-O seven-membered heterocycles via thermo-oxidation of oxazolidines**

Qiaonan Chen,<sup>a</sup> Xiao Liang,<sup>c</sup> Jiahui Du,<sup>a</sup> Zhonglin Wei,<sup>b</sup> Yu-Mo Zhang,<sup>b</sup> Ting Zhang,<sup>a</sup> Tianyou Qin,<sup>b</sup> Wenbin Gao,<sup>b</sup> Lan Sheng,<sup>\*b</sup> and Sean Xiao-An Zhang<sup>\*a,b</sup>

<sup>a</sup> State Key Laboratory of Supramolecular Structure and Materials, College of Chemistry, Jilin University, Changchun, 130012, P. R. China

E-mail: seanzhang@jlu.edu.cn; Fax: +86-431-85153812

<sup>b</sup> College of Chemistry, Jilin University, Changchun, 130012, P. R. China

E-mail: shenglan17@jlu.edu.cn; Fax: +86-431-85153812

<sup>c</sup> Key Laboratory for Molecular Enzymology and Engineering of Ministry of Education, School of Life Sciences, Jilin University, Changchun, 130012, P. R. China

# Table of Contents

|                                                                                                                                                      |     |
|------------------------------------------------------------------------------------------------------------------------------------------------------|-----|
| 1. General experimental information.....                                                                                                             | S4  |
| 2. Synthesis of 2a-2f, I and 3.....                                                                                                                  | S6  |
| 3. <sup>1</sup> H NMR spectra monitoring heating 1a-1f in DMSO- <i>d</i> <sub>6</sub> .....                                                          | S11 |
| 4. Structural characterizations of intermediate product I of 1b reacting with CH <sub>3</sub> I.....                                                 | S12 |
| 5. <sup>1</sup> H NMR spectra monitoring heating I in DMSO- <i>d</i> <sub>6</sub> .....                                                              | S13 |
| 6. Photographs of heating CH <sub>3</sub> I in DMSO.....                                                                                             | S14 |
| 7. HRMS spectra and <sup>1</sup> H NMR spectra monitoring reaction of 1g and CH <sub>3</sub> I in DMF and DMSO- <i>d</i> <sub>6</sub> at 120 °C..... | S15 |
| 8. <sup>1</sup> H NMR spectra monitoring heating 1b-OF in DMSO- <i>d</i> <sub>6</sub> .....                                                          | S16 |
| 9. Comparison of 1b-OF reaction in DMSO under aerobic and anaerobic conditions.....                                                                  | S18 |
| 10. Reaction of 1a-OF with H <sub>2</sub> O <sub>2</sub> in DMF.....                                                                                 | S19 |
| 11. Reaction of 1b-OF in DMSO/DMF with addition of radical inhibitor BHT.....                                                                        | S20 |
| 12. HRMS spectra for reaction solutions of 1b with NIS, NBS and NCS.....                                                                             | S21 |
| 13. Crystal data and structure refinement for 2a, 2b, 2c and 3.....                                                                                  | S22 |
| 14. Spectral data of 1a-OF-1f-OF and 2a-2f in DCM solutions and PMMA films.....                                                                      | S24 |
| 15. Fluorescent photographs of solid powders of 1a-OF-1f-OF, 2a-2f.....                                                                              | S28 |
| 16. Solvent polarity effects on optical properties of 2a-2f.....                                                                                     | S29 |
| 17. Photographs, UV-Vis spectra and fluorescent spectra of 2a-2f in PMMA with different weight percent.....                                          | S32 |
| 18. Comparison of fluorescence quantum efficiency of 2a and 2c with I <sup>-</sup> , Br <sup>-</sup> and PF <sub>6</sub> <sup>-</sup> .....          | S34 |

|                                                                                                                                               |     |
|-----------------------------------------------------------------------------------------------------------------------------------------------|-----|
| 19. Theoretical calculations of 2a-2f.....                                                                                                    | S36 |
| 20. Photostability and thermal stability of 2a-2f.....                                                                                        | S37 |
| 21. HRMS spectra of 2b-OH and UV-Vis spectra measurement for switch property of 2b.....                                                       | S39 |
| 22. Measurement of the pKa' of 2a-2f.....                                                                                                     | S40 |
| 23. HRMS spectra monitoring reaction of 2b and amines.....                                                                                    | S41 |
| 24. The selectivity to pH of 2b over reactive nitrogen and oxygen species.....                                                                | S42 |
| 25. The cytotoxicity of 2e.....                                                                                                               | S43 |
| 26. Effect of extracellular fluctuations under oxidative stress and with drug treatment on endocytosis efficiency and fluorescence of 2e..... | S44 |
| 27. <sup>1</sup> H NMR and <sup>13</sup> C NMR spectra.....                                                                                   | S45 |
| 28. The coordination of structures.....                                                                                                       | S53 |
| 29. References.....                                                                                                                           | S62 |

## 1. General experimental information

### *Materials*

Phenylhydrazine (98 %), 4-nitrophenylhydrazine (98 %), 4-methoxyphenylhydrazine hydrochloride (98 %), 4-dimethylaminobenzaldehyde (99 %) and diethyl malonate (99 %) were purchased from Sinopharm Chemical Reagent Co., Ltd. (Beijing, China). 3-Methyl-2-butanone (98 %), 2-bromoethanol (98 %), anisic aldehyde (99 %), 4-(Diethylamino)salicylaldehyde (98 %), Iodomethane (99.5 %), Iodine (98 %) and *N*-iodosuccinimide (98 %) were purchased from Energy Chemical (Shanghai, China). Sodium chloride (NaCl), sodium carbonate (Na<sub>2</sub>CO<sub>3</sub>) and anhydrous sodium sulfate (Na<sub>2</sub>SO<sub>4</sub>) were purchased from Beijing Chemical Factory (Beijing, China). Lyso Tracker Green and CellLight™ Mitochondria-GFP were obtained from Thermo Fisher (Eugene, OR). 4,6-diamidino-2-phenylindole (DAPI) were obtained from Amersco (Solon, USA). Solvents: Dimethyl sulfoxide (DMSO, HPLC) was purchased from Tianjin Guangfu Fine Chemical Research Institute (Tianjin, China); dimethylformamide (DMF) from Beijing Chemical Factory (Beijing, China). Unless otherwise stated, all reagents and solvents were used without further purification.

### *Instruments*

The UV-Vis absorption spectra were measured using a 0.1 cm quartz cuvette on a Shimadzu UV-2550 PC double-beam spectrophotometer. The fluorescent emission spectra were measured using a 0.1 cm quartz cuvette on a Shimadzu RF-5301 PC spectrofluorophotometer with a xenon lamp as a light source. The fluorescence quantum yields ( $\Phi_f$ ) and fluorescence lifetime (under the excitation at 400 nm) were measured on Edinburgh FLS 920 steady state spectrometer. The LC-HRMS (ESI) analysis was performed on an Agilent 1290-micro TOF-Q II mass spectrometer. <sup>1</sup>H NMR and <sup>13</sup>C NMR spectra were recorded on a Bruker AVANCE500 (500M) and Wuhan Zhongke Niujiu As 400 (400M) at room temperature and were reported in ppm and determined with tetramethylsilane (TMS) or respect to residual signals of the deuterated solvents as internal standards (TMS, 0.00; CDCl<sub>3</sub>, 7.26; DMSO-*d*<sub>6</sub>, 2.50 for <sup>1</sup>H NMR and CDCl<sub>3</sub>, 77.0; DMSO-*d*<sub>6</sub>, 39.5 for <sup>13</sup>C NMR). Melting point was determined using a SGW X-4B microscopy melting point apparatus. Flow cytometry (cyto FLEX, Beckman COULTER). Confocal laser scanning microscope (Carl Zeiss Microscopy LLC, Jena, Germany).

## ***Methods***

**Cytotoxicity assays.** The viabilities of cells treated with **2e** were measured by a well-established 3-(4, 5-dimethylthiazol-2-yl)-2, 5-diphenyltetrazolium bromide (MTT) assay. Generally, HeLa cells, A549 cells and SW480 cells were seeded in 96-well plates harboring 2 mL of 10% FBS-containing DMEM at a density of 8000 cells per well. The cells were incubated with drugs at concentrations from 0 to 100  $\mu\text{g}/\text{mL}$ , and cells without treatment were used as a control. After the incubation at 37 °C for 20 h, the standard MTT assay was used to determine the cell viability. Five repeats were conducted for each sample.

**Co-localization experiments of 2e with commercial organelle-specific probes.** HeLa cells were seeded into 6-well plates at a density of  $2.5 \times 10^5$  cells/well and cultured with a sterilized coverslip for 12 h. Then the cells were treated with **2e** at the concentration of  $1 \mu\text{g}/\text{mL}$  for 4 h, respectively. Afterwards, the cells were stained with CellLight™ Mitochondria-GFP and Lyso Tracker Green DND-26 according to the manufacturer's protocol, respectively. Then the cells were washed with PBS for three times, followed by fixing with cold 75% ethanol at 4 °C for 20 min and then stained with DAPI solution. Finally, the cover slips were taken from the wells and observed with confocal laser scanning microscope (CLSM).

**Visualizing extracellular fluctuations under oxidative stress and with drug treatment.** Rosup, 5-fluorouracil (5-FU) and methotrexate (MTX) were used to construct oxidative and drug environments and then the endocytosis of **2e** was detected under these conditions. HeLa cells were seed into 6-well plates at a density of  $2.5 \times 10^5$  cells/well, and first, the cells were treated with Rosup, 5-FU and MTX, respectively. Then the medium was discarded after 1 hour treatment, and the cells were washed with phosphate buffer saline (PBS) three times. After that, **2e** was incubated with cells at concentration of  $1 \mu\text{g}/\text{mL}$  for 4 h. The endocytosis efficiency of **2e** was determined by flow cytometry and CLSM.

## 2. Synthesis of 2a-2f, I and 3

### 2.1 Synthesis of thermo-oxidation products oxazolidines (2a-2f)

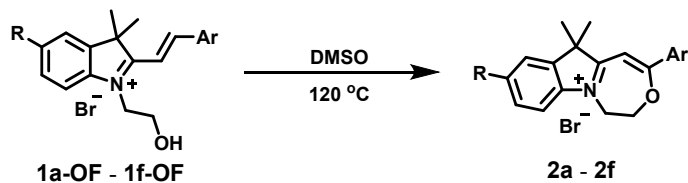

General synthesis method 1 of **2a-2f**. Starting materials **1a-OF-1f-OF** were prepared as reported.<sup>S1</sup> **1a-OF-1f-OF** (100 mg) was stirred in dimethyl sulphoxide (2 mL) at 120 °C for 2 ~ 11 h (for **1f-OF**, 10 mg I<sub>2</sub> was added to prevent ring-closing of it). The reaction mixture was added with saturated solution of NaCl (20 mL). Dichloromethane (CH<sub>2</sub>Cl<sub>2</sub>) was added to extract product for 2 times and the CH<sub>2</sub>Cl<sub>2</sub> layer was washed with saturated solution of NaCl for 1 time. Then the solvent was dried with anhydrous sodium sulfate and removed under reduced pressure. The crude mixture was precipitated as black solid. Purification of the crude mixture by chromatography (CH<sub>2</sub>Cl<sub>2</sub> / MeOH = 50 / 1 to 20 / 1) afforded the product **2a-2f**. The products for characterizations below were obtained by method 1.

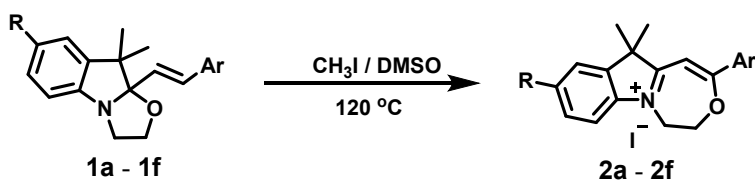

General synthesis method 2 of **2a-2f**. Starting materials **1a-1f** were prepared as reported.<sup>S1</sup> A mixture of **1s** (0.37 mmol) and iodomethane (8 mmol) was stirred in dimethyl sulphoxide (2 mL) at 120 °C for 11 h. The reaction mixture was precipitated by addition of saturated solution of NaCl (20 mL) and filtered as brown powder. Purification of the crude reaction mixture by chromatography (CH<sub>2</sub>Cl<sub>2</sub> / MeOH = 50 / 1 to 20 / 1) afforded the product **2a-2f**.

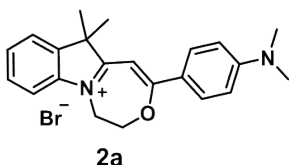

Yield: 31 %. m.p. 239.5 – 240.5 °C; <sup>1</sup>H NMR (500 MHz, DMSO-*d*<sub>6</sub>): δ 8.03 (d, *J* = 9.2 Hz, 2H), 7.69 (d, *J* = 7.4 Hz, 1H), 7.58 (d, *J* = 7.4 Hz, 1H), 7.51 (t, *J* = 7.4 Hz, 1H), 7.41 (t, *J* = 7.4 Hz, 1H), 6.85 (d, *J* = 9.2 Hz, 2H), 6.59 (s, 1H), 5.02 (s, 2H), 4.65 (s, 2H), 3.12 (s, 6H), 1.62 (s, 6H); <sup>13</sup>C NMR (126 MHz, DMSO-*d*<sub>6</sub>): δ 176.9, 176.5, 154.1, 142.3, 139.9, 131.1, 128.5, 126.4, 123.1, 117.9, 112.2, 111.5, 85.8, 70.2, 51.2, 49.0, 24.7; LC-HRMS (ESI): *m/z* calculated for [*M* + H]<sup>+</sup> 333.1961, found 333.1967.

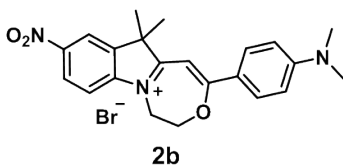

Yield: 28 %. m.p. 246.9 – 247.9 °C; <sup>1</sup>H NMR (400 MHz, DMSO-*d*<sub>6</sub>): δ 8.62 (s, 1H), 8.43 (d, *J* = 8.7 Hz, 1H), 8.08 (d, *J* = 8.7 Hz, 2H), 7.73 (d, *J* = 8.7 Hz, 1H), 6.89 (d, *J* = 8.7 Hz, 2H), 6.68 (s, 1H), 5.07 (s, 2H), 4.66 (s, 2H), 3.16 (s, 6H), 1.68 (s, 6H); <sup>13</sup>C NMR (100 MHz, DMSO-*d*<sub>6</sub>): δ 178.3, 178.0, 154.9, 147.4, 145.2, 140.9, 132.1, 125.3, 118.9, 117.4, 112.4, 111.8, 86.9, 70.6, 50.9, 49.3, 39.77, 24.8; LC-HRMS (ESI): *m/z* calculated for [*M* + H]<sup>+</sup> 378.1812, found 378.1815.

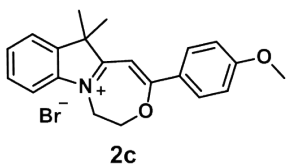

Yield: 30 %. m.p. 229.8 – 230.7 °C; <sup>1</sup>H NMR (500 MHz, DMSO-*d*<sub>6</sub>): δ 8.15 (d, *J* = 8.9 Hz, 2H), 7.74 (d, *J* = 8.0 Hz, 1H), 7.69 (d, *J* = 8.0 Hz, 1H), 7.56 (t, *J* = 7.5 Hz, 1H), 7.48 (t, *J* = 7.5 Hz, 1H), 7.17 (d, *J* = 8.9 Hz, 2H), 6.78 (s, 1H), 5.10 (s, 2H), 4.77 (s, 2H), 3.90 (s, 3H), 1.65 (s, 6H); <sup>13</sup>C NMR (100 MHz, DMSO-*d*<sub>6</sub>): δ 178.9, 176.0, 164.0, 142.1, 140.4, 131.1, 128.6, 127.3, 124.7, 123.2, 114.6, 113.1, 88.0, 70.7, 55.9, 51.9, 49.5, 24.0. LC-HRMS (ESI): *m/z* calculated for [*M* + H]<sup>+</sup> 320.1645, found 320.1644.

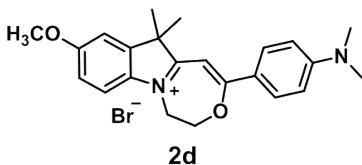

Yield: 30 %. m.p. 225.1 – 226.0 °C; <sup>1</sup>H NMR (400 MHz, DMSO-*d*<sub>6</sub>): δ 7.99 (d, *J* = 9.1 Hz, 2H), 7.51 (d, *J* = 8.7 Hz, 1H), 7.35 (d, *J* = 2.3 Hz, 1H), 7.06 (dd, *J* = 8.7, 2.3 Hz, 1H), 6.84 (d, *J* = 9.1 Hz, 2H), 6.53 (s, 1H), 4.98 (s, 2H), 4.63 (s, 2H), 3.83 (s, 3H), 3.11 (s, 6H), 1.61 (s, 6H); <sup>13</sup>C NMR (126 MHz, DMSO-*d*<sub>6</sub>): δ 175.9, 175.4, 158.8, 153.9, 141.9, 135.8, 130.8, 118.1, 113.5, 113.3, 111.5, 109.5, 85.7,

70.0, 55.9, 51.3, 49.3, 24.6. LC-HRMS (ESI):  $m/z$  calculated for  $[M + H]^+$  363.2067, found 363.2073.

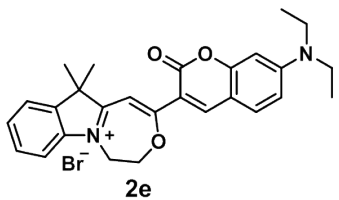

Yield: 29 %. m.p. 214.3 – 215.2 °C; <sup>1</sup>H NMR (400 MHz, DMSO-*d*<sub>6</sub>): δ 8.70 (s, 1H), 7.75 (d, *J* = 7.2 Hz, 1H), 7.72 (d, *J* = 9.1 Hz, 1H), 7.66 (d, *J* = 8.0 Hz, 1H), 7.56 (t, *J* = 7.4 Hz, 1H), 7.47 (t, *J* = 7.4 Hz, 1H), 7.38 (s, 1H), 6.92 (d, *J* = 9.1 Hz, 1H), 6.69 (s, 1H), 5.03 (s, 2H), 4.73 (s, 2H), 3.56 (q, *J* = 7.0 Hz, 4H), 1.57 (s, 6H), 1.17 (t, *J* = 7.0 Hz, 6H); <sup>13</sup>C NMR (100 MHz, DMSO-*d*<sub>6</sub>): δ 177.9, 171.3, 158.7, 158.0, 154.1, 147.3, 142.4, 140.0, 132.8, 128.7, 127.2, 123.3, 113.0, 111.2, 108.7, 108.0, 96.0, 90.5, 70.1, 51.3, 49.7, 44.8, 24.7, 12.4. LC-HRMS (ESI):  $m/z$  calculated for  $[M + H]^+$  429.2173, found 429.2174.

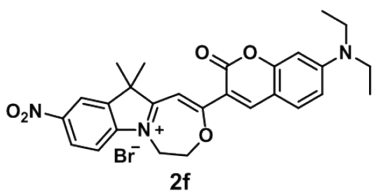

Yield: 16 %. m.p. 174.5 – 175.2 °C; <sup>1</sup>H NMR (400 MHz, DMSO-*d*<sub>6</sub>): δ 8.74 (s, 1H), 8.71 (d, *J* = 2.3 Hz, 1H), 8.45 (dd, *J* = 8.8, 2.3 Hz, 1H), 7.84 (d, *J* = 8.8 Hz, 1H), 7.75 (d, *J* = 9.5 Hz, 1H), 7.43 (s, 1H), 6.95 (dd, *J* = 9.1, 2.1 Hz, 1H), 6.71 (d, *J* = 2.1 Hz, 1H), 5.07 (s, 2H), 4.74 (s, 2H), 3.59 (q, *J* = 6.9 Hz, 4H), 1.64 (s, 6H), 1.18 (t, *J* = 6.9 Hz, 6H); <sup>13</sup>C NMR (100 MHz, DMSO-*d*<sub>6</sub>): δ 179.8, 173.8, 158.6, 158.3, 154.7, 148.0, 147.2, 145.8, 140.9, 133.3, 125.4, 119.2, 113.4, 111.6, 109.2, 107.5, 96.2, 91.1, 70.6, 51.2, 49.9, 44.9, 24.7, 12.5. LC-HRMS (ESI):  $m/z$  calculated for  $[M + H]^+$  474.2023, found 474.2015.



## 2.2 Synthesis of I

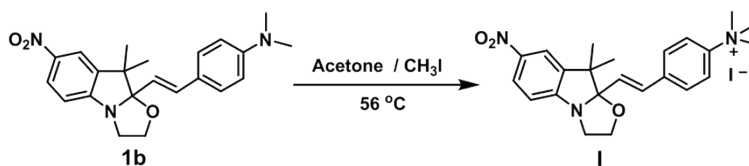

A mixture of **1b** (380 mg, 1 mmol) and iodomethane (1.2 mL, 19.2 mmol) was stirred in acetone (6 mL) at  $56\text{ }^\circ\text{C}$  for 11 h. Light yellow solid was produced and precipitated as reaction proceeded. After removal of the solvent, the crude product was washed with acetone for 5 times to afford the product as a light yellow solid **I** (470 mg, Yield: 90.2 %). m.p.  $138.6 - 139.5\text{ }^\circ\text{C}$ ;  $^1\text{H}$  NMR (500 MHz,  $\text{DMSO-}d_6$ ):  $\delta$  8.13 (dd,  $J = 8.7, 2.1\text{ Hz}$ , 1H), 8.06 (d,  $J = 2.1\text{ Hz}$ , 2H), 7.93 (d,  $J = 8.9\text{ Hz}$ , 2H), 7.84 (d,  $J = 8.9\text{ Hz}$ , 2H), 7.12 (d,  $J = 8.7\text{ Hz}$ , 1H), 6.90 (d,  $J = 16.1\text{ Hz}$ , 1H), 6.56 (d,  $J = 16.1\text{ Hz}$ , 1H), 3.45 – 3.89 (m, 4H), 3.60 (s, 9H), 1.46 (s, 3H), 1.15 (s, 3H);  $^{13}\text{C}$  NMR (126 MHz,  $\text{DMSO-}d_6$ ):  $\delta$  157.1, 146.5, 141.9, 140.4, 137.5, 130.1, 128.2, 127.6, 125.1, 120.7, 118.5, 111.9, 109.2, 63.3, 56.4, 48.9, 46.9, 30.7, 27.5, 20.1; LC-HRMS (ESI):  $m/z$  calculated for  $[\text{M} + \text{H}]^+$  394.2125, found 394.2125.

### 2.3 Synthesis of **3**

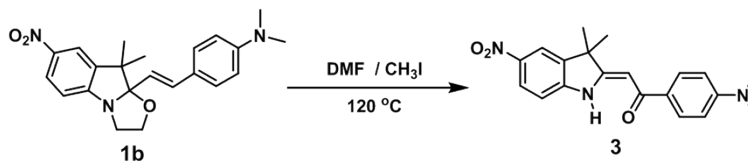

A mixture of **1b** (400 mg, 1.05 mmol) and iodomethane (0.62 mL, 10 mmol) was stirred in dimethylformamide (2 mL) at 110 °C for 36 h. Then the solvent was removed under reduced pressure and the crude mixture was precipitated as black solid. Purification of the crude mixture by chromatography (Petroleum ether / EtOAc = 6 / 1) afforded the product as a yellow solid **3** (20 mg, Yield: 5.4 %). m.p. 221.9 – 222.8 °C; <sup>1</sup>H NMR (500 MHz, DMSO-*d*<sub>6</sub>): δ 11.87 (s, 1H), 8.18 (dd, *J* = 8.6, 2.1 Hz, 1H), 8.10 (d, *J* = 2.1 Hz, 1H), 7.92 (d, *J* = 8.9 Hz, 2H), 6.93 (d, *J* = 8.6 Hz, 1H), 6.73 (d, *J* = 8.9 Hz, 2H), 6.18 (s, 1H), 3.07 (s, 6H), 1.51 (s, 6H); <sup>13</sup>C NMR (126 MHz, DMSO-*d*<sub>6</sub>): δ 189.2, 170.6, 148.7, 142.7, 138.7, 129.7, 126.0, 118.6, 111.3, 109.0, 90.2, 46.9, 40.4, 28.0; LC-HRMS (ESI): *m/z* calculated for [*M* + H]<sup>+</sup> 352.1656, found 352.1659.

### 3. $^1\text{H}$ NMR spectra monitoring heating 1a-1f in $\text{DMSO-}d_6$

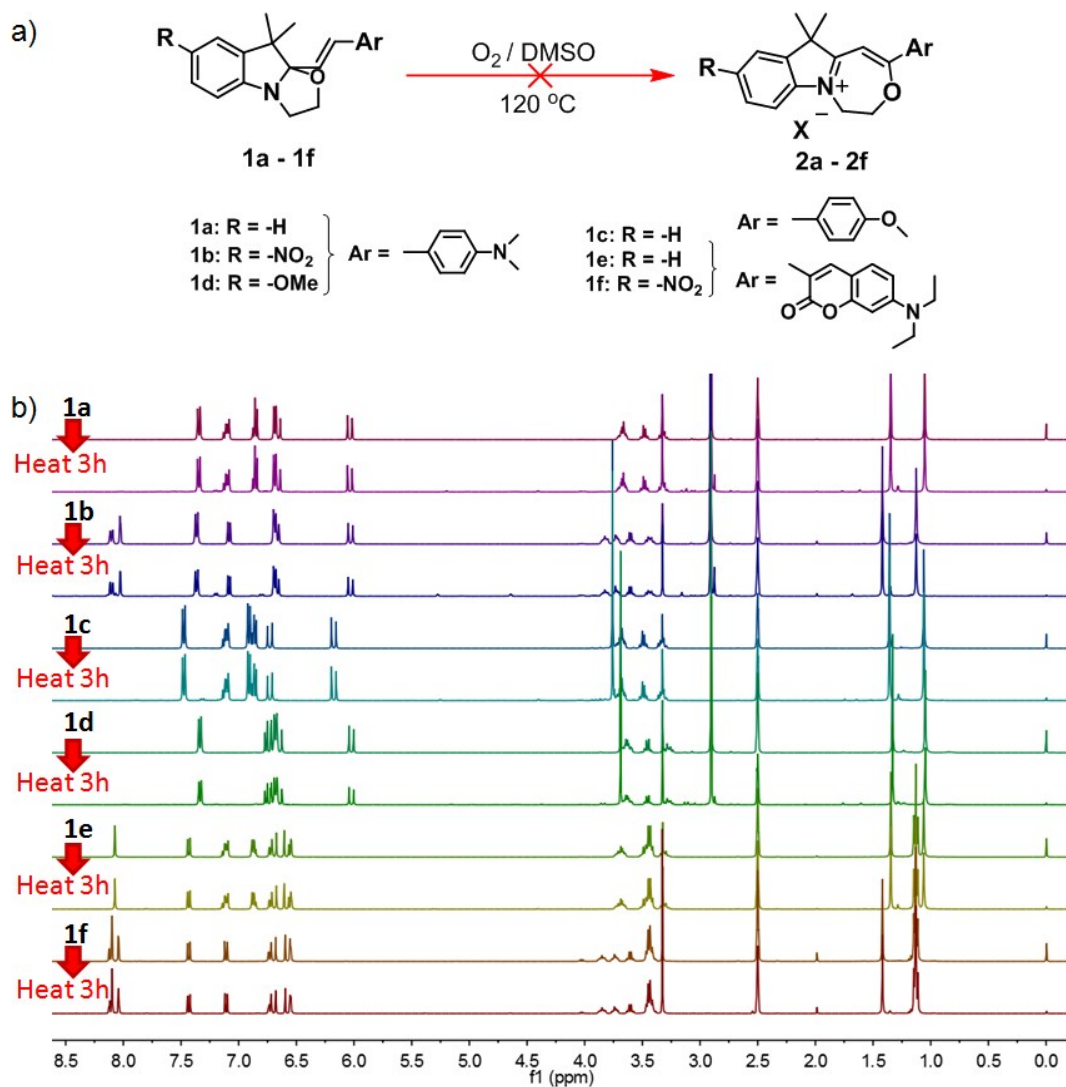

**Figure S1.** (a) Reaction of **1a-1f** in  $\text{DMSO-}d_6$ . (b)  $^1\text{H}$  NMR spectra of **1a-1f** in  $\text{DMSO-}d_6$  (5mg / 0.5 mL) before and after heating for 3 h at 120 °C.

#### 4. Structural characterizations of intermediate product **I** of **1b** reacting with $\text{CH}_3\text{I}$

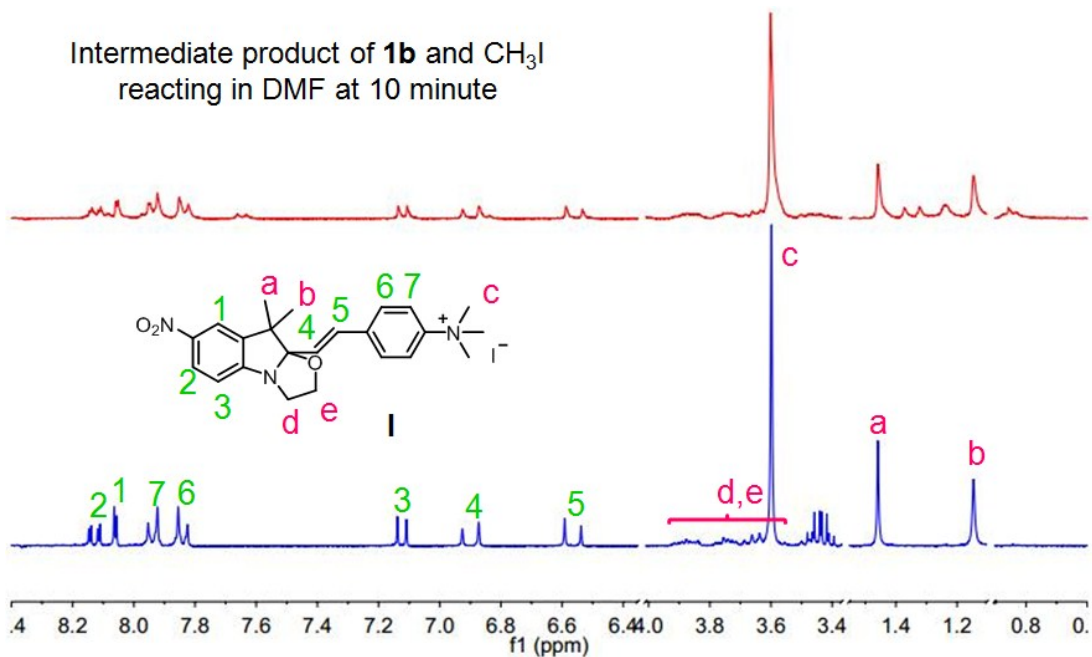

**Figure S2.**  $^1\text{H}$  NMR spectra comparison between **I** (blue line) and intermediate products of **1b** and  $\text{CH}_3\text{I}$  reacting in DMF at 10 minutes (red line).

## 5. $^1\text{H}$ NMR spectra monitoring heating I in $\text{DMSO-}d_6$

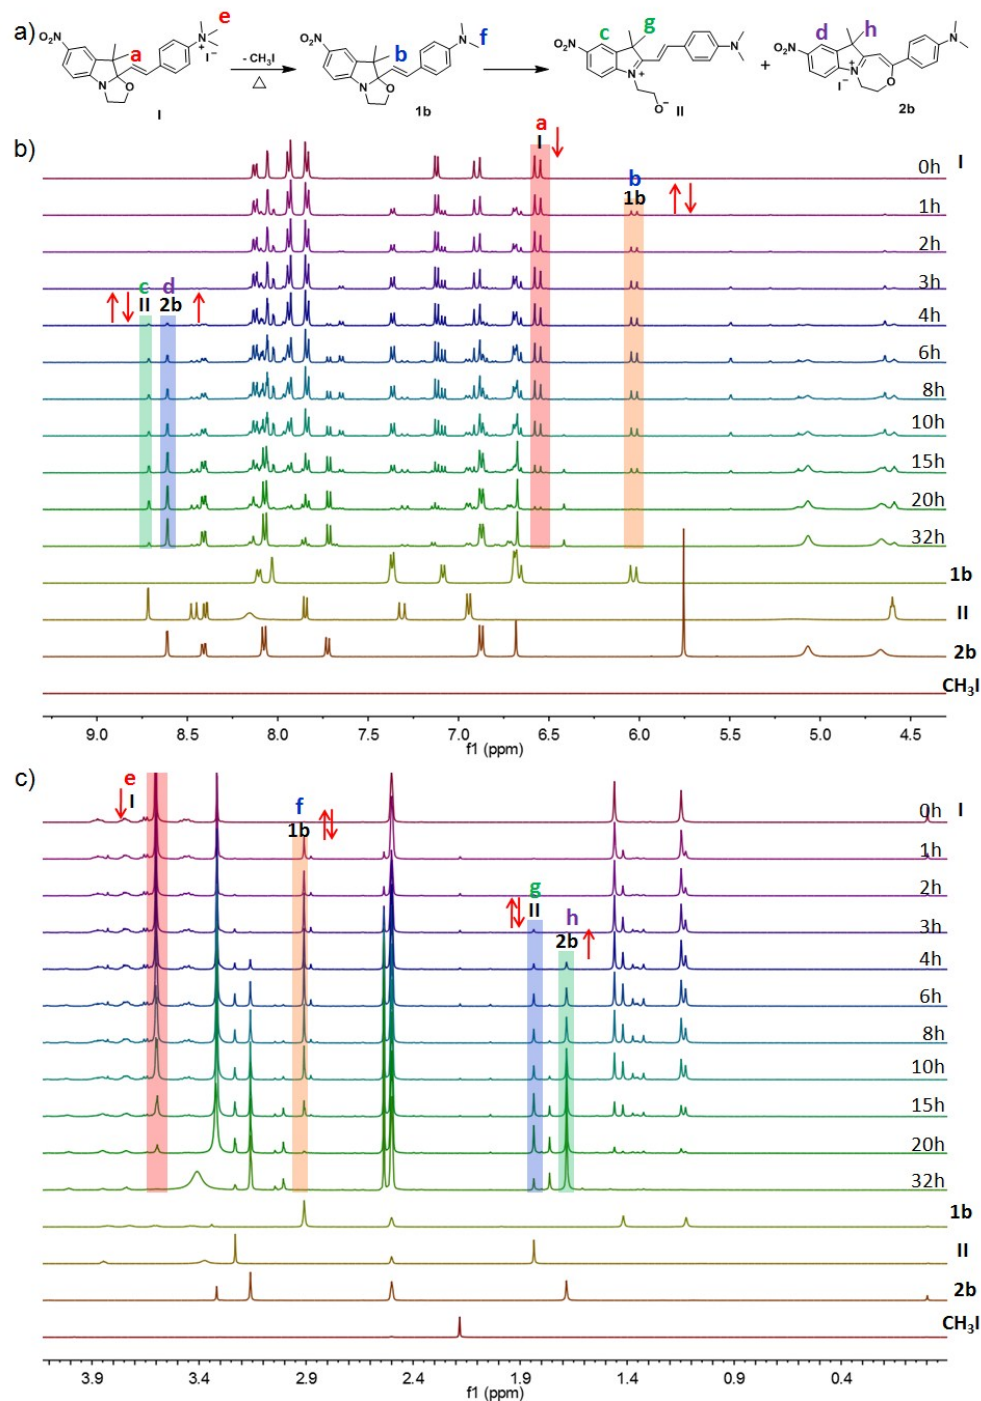

**Figure S3.** (a) Probable reaction process of **I** in  $\text{DMSO-}d_6$  at  $120^\circ\text{C}$ . (b)  $^1\text{H}$  NMR spectra variation of **I** in  $\text{DMSO-}d_6$  (5mg / 0.5 mL) in (b) low and (c) high magnetic fields at  $120^\circ\text{C}$  with reaction time.

## 6. Photographs of heating CH<sub>3</sub>I in DMSO

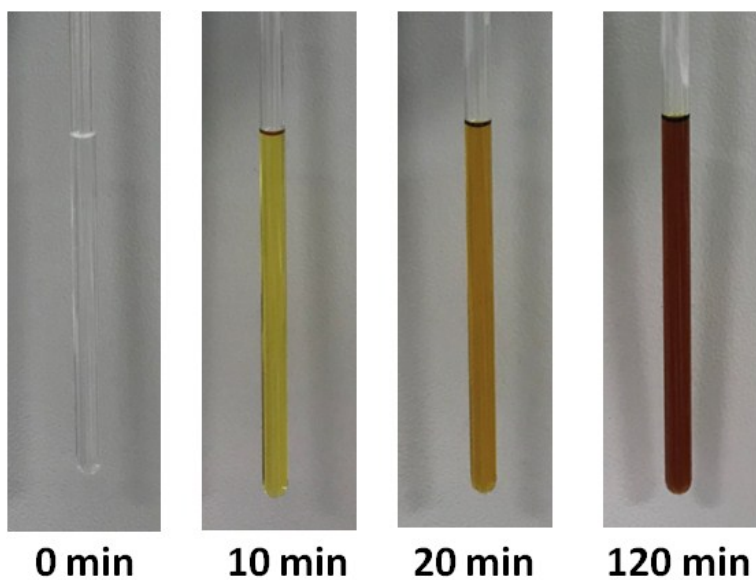

**Figure S4.** Photographs of CH<sub>3</sub>I heated in DMSO over time in the dark at 120 °C.

The DMSO solution of CH<sub>3</sub>I gradually changed from colorless to brown with heating time, which indicated the generation of I<sub>2</sub> from thermolysis of CH<sub>3</sub>I.

## 7. HRMS and $^1\text{H}$ NMR spectra monitoring reaction of **1g** and $\text{CH}_3\text{I}$ in DMF at $120\text{ }^\circ\text{C}$

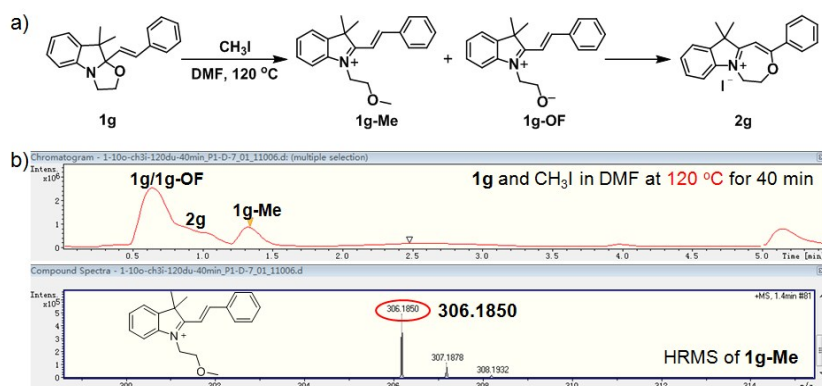

**Figure S5.** (a) Probable reaction process of **1g** and  $\text{CH}_3\text{I}$  in DMF at  $120\text{ }^\circ\text{C}$ . (b) HRMS spectra of **1g** and  $\text{CH}_3\text{I}$  in DMF at  $120\text{ }^\circ\text{C}$  for 40 min (above) and HRMS spectra of **1g-Me** (below).

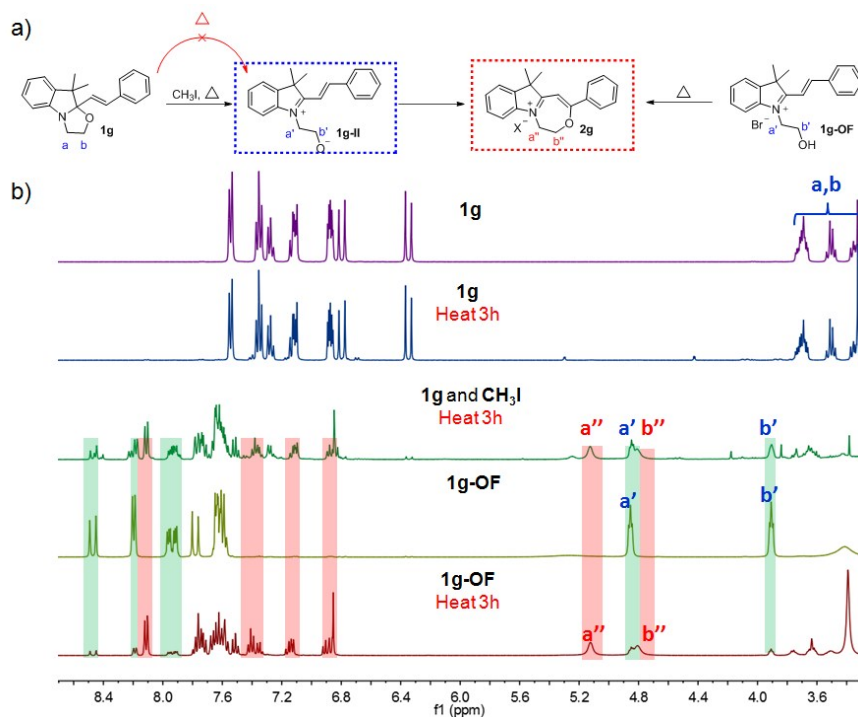

**Figure S6.** (a) Probable reaction process of **1g** and  $\text{CH}_3\text{I}$  in  $\text{DMSO-}d_6$  at  $120\text{ }^\circ\text{C}$ . (b)  $^1\text{H}$  NMR spectra comparison of **1g** (purple), **1g** after heating 3 h (blue), **1g** and  $\text{CH}_3\text{I}$  after heating 3 h (green), **1g-OF** (yellow) and **1g-OF** after heating 3 h (dark red) (5 mg / 0.5 mL in  $\text{DMSO-}d_6$ ).

## 8. $^1\text{H}$ NMR spectra monitoring heating 1b-OF in $\text{DMSO-}d_6$

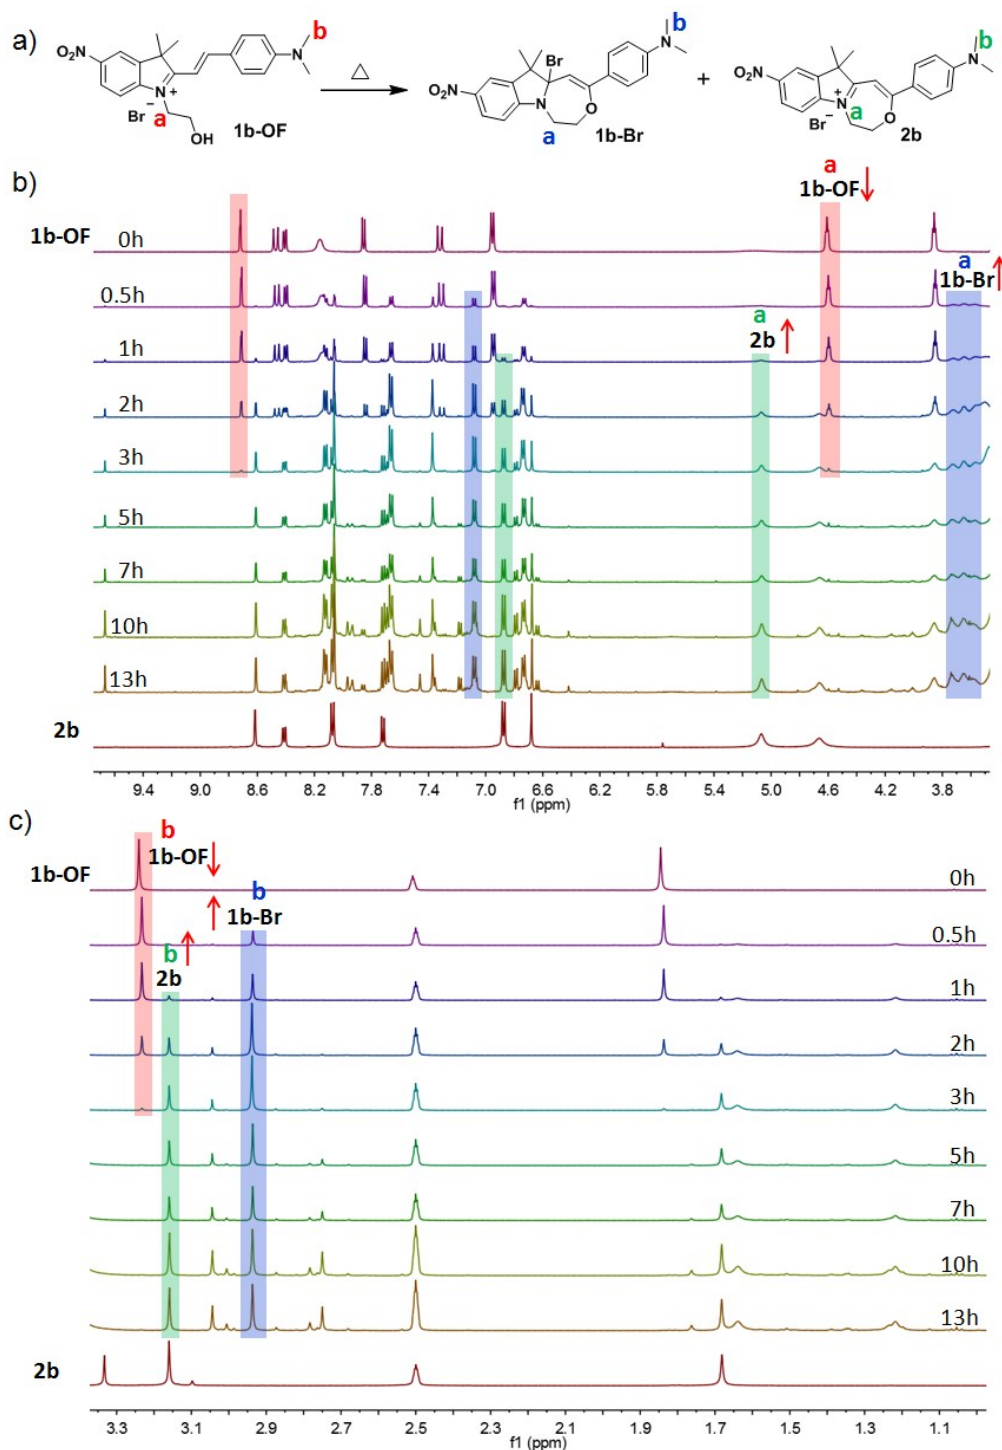



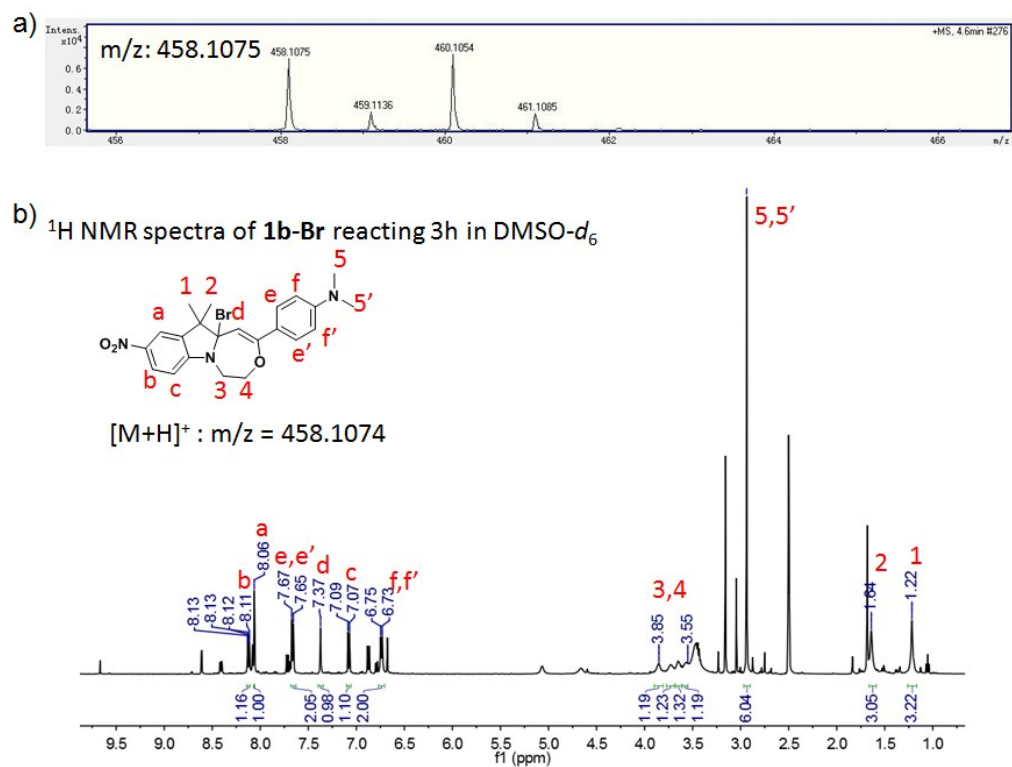

**Figure S8.** (a) HRMS spectrum of **1b-Br** and (b)  $^1\text{H}$  NMR spectrum of **1b-OF** in  $\text{DMSO-}d_6$  (5 mg / 0.5 mL) after reacting 3h at 120 °C and the speculated structure of **1b-Br**.

## 9. Comparison of **1b-OF** reaction in DMSO under aerobic and anaerobic conditions

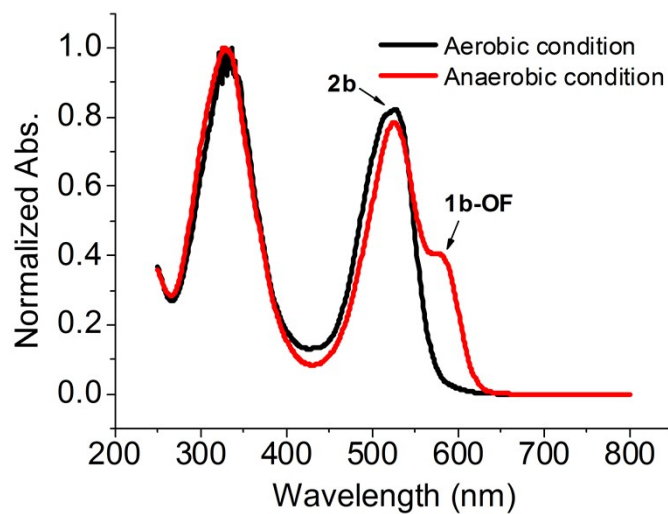

**Figure S9.** The UV-Vis spectra of the diluted reaction solution of **1b-OF** after heating for 4 hours in DMSO under aerobic (black line) and anaerobic (red line) conditions.

**1b-OF** could be oxidized to **2b** both under aerobic and anaerobic condition, but it exhibits a slower reaction rate under anaerobic condition within the same reaction time of 4 h. It proved that except  $O_2$ , DMSO also works as oxidant in this reaction.

## 10. Reaction of **1a-OF** with H<sub>2</sub>O<sub>2</sub> in DMF

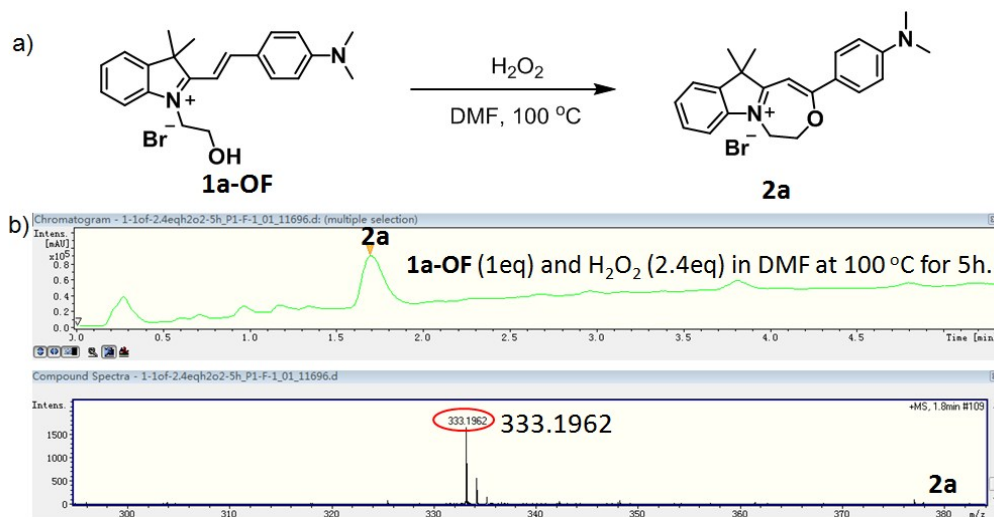

**Figure S10.** (a) Reaction process of **1a-OF** and H<sub>2</sub>O<sub>2</sub> in DMF solution at 100 °C. (b) HRMS spectra for reaction solutions of **1a-OF** (1.0 eq) and H<sub>2</sub>O<sub>2</sub> (2.4 eq) in DMF solution at 100 °C for 5 h.

## 11. Reaction of 1b-OF in DMSO/DMF solutions with addition of radical inhibitor BHT

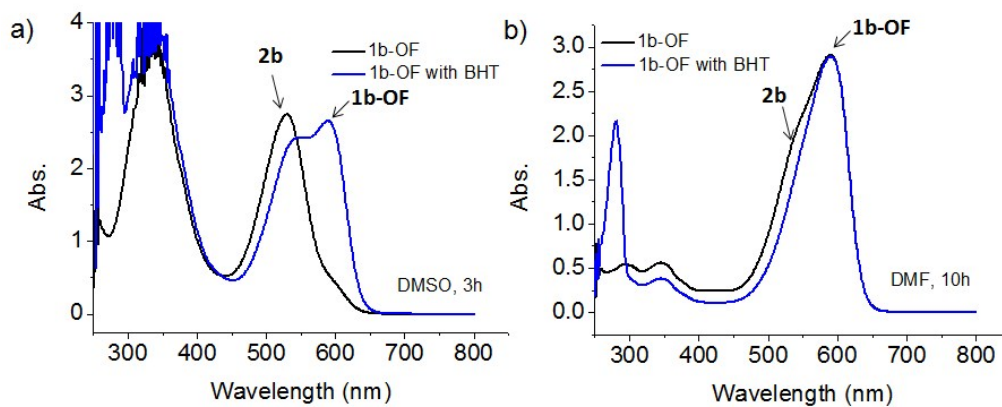

**Figure S11.** UV-Vis spectra for the diluted reaction solutions of **1b-OF** with (blue line) and without (black line) addition of butylated hydroxytoluene (BHT) in (a) DMSO and (b) DMF solutions, respectively.

## 12. HRMS spectra for reaction solutions of **1b** with NIS, NBS and NCS

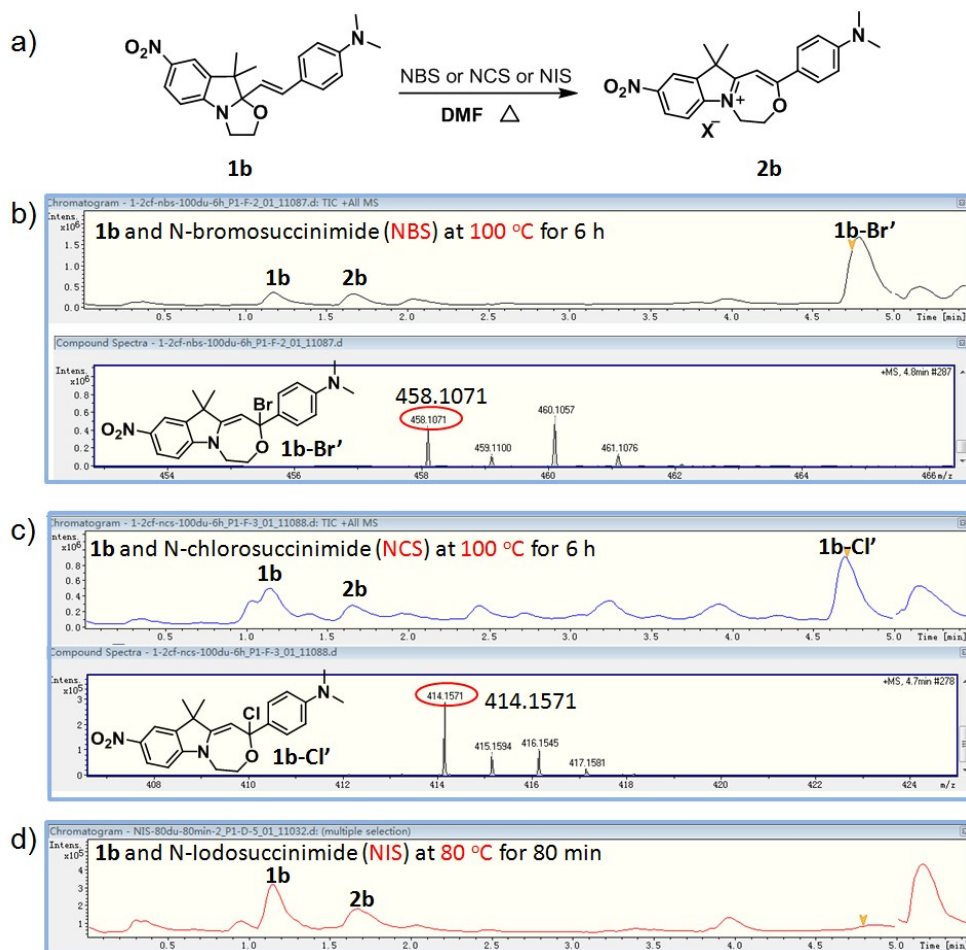

**Figure S12.** (a) Reaction process of **1b** (1.0 eq) with N-iodosuccinimide (NIS), N-bromosuccinimide (NBS), and N-chlorosuccinimide (NCS) (1.2 eq) in DMF solution. (b) – (d) HRMS spectra for reaction solutions of **1b** with NBS at 100 °C for 6 h, NCS at 100 °C for 6 h and NIS at 80 °C for 80 min, respectively.

### 13. Crystal data and structure refinement for 2a, 2b, 2c and 3

Single crystals of **2a**, **2b**, **2c** and **3** were all obtained by vapor diffusion of n-hexane into their acetonitrile solutions of **2a**, **2b** and **2c**. Single crystal of **3** was obtained by slow evaporation in mixed solution of n-hexane and EtOAc.

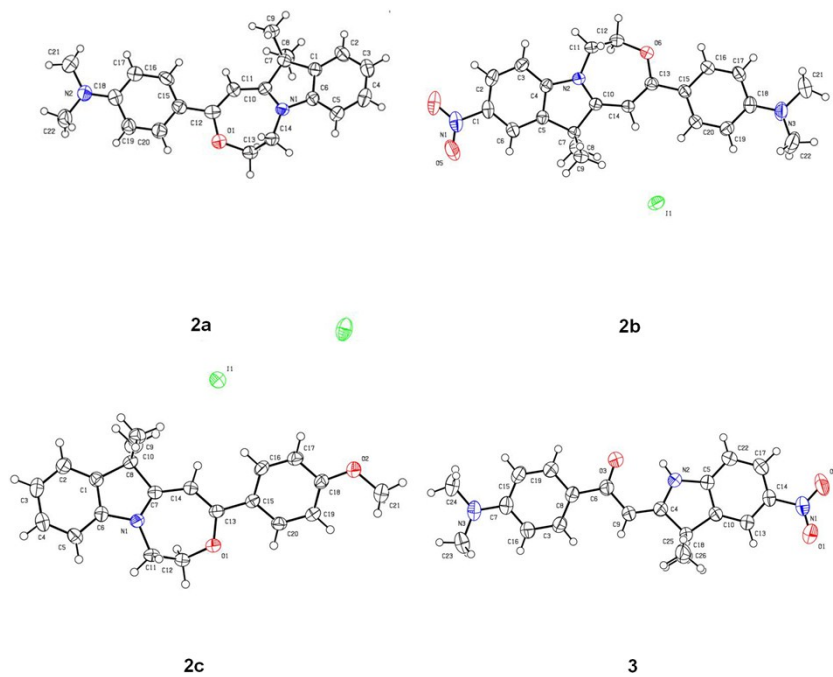

**Figure S13.** Single-crystal X-ray structures of **2a**, **2b**, **2c** and **3** (50 % probability ellipsoids). The anion in **2a**, **2b** and **2c** is I<sup>-</sup>.

**Table S1.** Summary of crystal data and intensity collection parameters for **2a**, **2b**, **2c** and **3**.

| Compound                                                                      | <b>2b</b>                                                      | <b>2a</b>                                         | <b>2c</b>                                        | <b>3</b>                                                      |
|-------------------------------------------------------------------------------|----------------------------------------------------------------|---------------------------------------------------|--------------------------------------------------|---------------------------------------------------------------|
| Formula                                                                       | C <sub>22</sub> H <sub>24</sub> IN <sub>3</sub> O <sub>3</sub> | C <sub>22</sub> H <sub>25</sub> IN <sub>2</sub> O | C <sub>21</sub> H <sub>22</sub> INO <sub>2</sub> | C <sub>20</sub> H <sub>21</sub> N <sub>3</sub> O <sub>3</sub> |
| Formula mass                                                                  | 505.34                                                         | 460.34                                            | 447.29                                           | 351.40                                                        |
| Space group                                                                   | monoclinic<br>P 21/n                                           | monoclinic<br>P 21/c                              | triclinic<br>P-1                                 | monoclinic<br>P 21/c                                          |
| <i>a</i> / Å                                                                  | 6.4834 (13)                                                    | 20.1317(10)                                       | 9.4276(5)                                        | 10.118(2)                                                     |
| <i>b</i> / Å                                                                  | 23.560 (5)                                                     | 7.4780(4)                                         | 10.1879(5)                                       | 9.1993(18)                                                    |
| <i>c</i> / Å                                                                  | 14.458(3)                                                      | 13.4306(6)                                        | 11.1539(6)                                       | 20.098(4)                                                     |
| <i>α</i> / °                                                                  | 90                                                             | 90                                                | 111.6410(10)                                     | 90                                                            |
| <i>β</i> / °                                                                  | 100.21(3)                                                      | 94.394(2)                                         | 97.790(2)                                        | 100.49(3)                                                     |
| <i>γ</i> / °                                                                  | 90                                                             | 90                                                | 99.874(2)                                        | 90                                                            |
| V / Å <sup>3</sup>                                                            | 2173.4(8)                                                      | 2015.96(17)                                       | 957.65(9)                                        | 1839.4(7)                                                     |
| Z                                                                             | 4                                                              | 4                                                 | 2                                                | 4                                                             |
| ρ/ g.cm <sup>-3</sup>                                                         | 1.544                                                          | 1.517                                             | 1.551                                            | 1.269                                                         |
| μ/ mm <sup>-1</sup>                                                           | 1.501                                                          | 1.601                                             | 1.685                                            | 0.087                                                         |
| F000                                                                          | 1016                                                           | 928                                               | 448                                              | 744.0                                                         |
| Temp, (K)                                                                     | 293(2) K                                                       | 273(2) K                                          | 273(2) K                                         | 293 K                                                         |
| No. of reflns. collected                                                      | 19917                                                          | 12417                                             | 6501                                             | 17394                                                         |
| No. of unique reflns.                                                         | 4975                                                           | 3542                                              | 3553                                             | 4194                                                          |
| R <sub>int</sub>                                                              | 0.0276                                                         | 0.0437                                            | 0.0215                                           | 0.0325                                                        |
| Final <i>R</i> 1 values ( <i>I</i> > 2σ( <i>I</i> ))                          | 0.0320                                                         | 0.0378                                            | 0.0318                                           | 0.0466                                                        |
| Final <i>wR</i> ( <i>F</i> <sup>2</sup> ) values ( <i>I</i> > 2σ( <i>I</i> )) | 0.0724                                                         | 0.0777                                            | 0.0732                                           | 0.1199                                                        |
| Final <i>R</i> 1 values (all data)                                            | 0.0405                                                         | 0.0576                                            | 0.0398                                           | 0.0690                                                        |
| Final <i>wR</i> ( <i>F</i> <sup>2</sup> ) values (all data)                   | 0.0774                                                         | 0.0869                                            | 0.0789                                           | 0.1289                                                        |
| Goodness of fit on <i>F</i> <sup>2</sup>                                      | 1.124                                                          | 1.023                                             | 1.015                                            | 1.057                                                         |
| CCDC numbers                                                                  | 1562292                                                        | 1562290                                           | 1562291                                          | 1571735                                                       |

## 14. Spectral data of 1a-OF-1f-OF and 2a-2f in DCM solutions and PMMA films

### 14.1 Maximum absorption wavelength, maximum emission wavelength and molar absorption coefficient of 1a-OF-1f-OF and 2a-2f.

**Table S2.** Spectral data including maximum absorption wavelength, maximum emission wavelength and molar absorption coefficient of **1a-OF** to **1f-OF** and **2a** to **2f** (a) in DCM solutions ( $3.0 \times 10^{-5}$  M) and (b) in PMMA films (**2e** is 0.6% and others are 1.0 % weight percent).

a)

| Solution (in DCM) | $\lambda_{1,abs}$ (nm) | $\lambda_{1,em}$ (nm) | $\epsilon_1$ (L/mol-cm) | Solution (in DCM) | $\lambda_{2,abs}$ (nm) | $\lambda_{2,em}$ (nm) | $\epsilon_2$ (L/mol-cm) | $\Delta\lambda_{abs} = \lambda_{2,abs} - \lambda_{1,abs}$ | $\Delta\lambda_{em} = \lambda_{2,em} - \lambda_{1,em}$ | $\Delta\epsilon = \epsilon_2 - \epsilon_1$ (L/mol-cm) |
|-------------------|------------------------|-----------------------|-------------------------|-------------------|------------------------|-----------------------|-------------------------|-----------------------------------------------------------|--------------------------------------------------------|-------------------------------------------------------|
| 1a-OF             | 559                    | 592                   | 86530                   | 2a                | 517                    | 557                   | 84190                   | -42                                                       | -35                                                    | -2340                                                 |
| 1b-OF             | 593                    | 624                   | 137380                  | 2b                | 535                    | 578                   | 90450                   | -58                                                       | -47                                                    | -46930                                                |
| 1c-OF             | 445                    | 482                   | 36760                   | 2c                | 427                    | 480                   | 42420                   | -18                                                       | -2                                                     | 5660                                                  |
| 1d-OF             | 561                    | 603                   | 73550                   | 2d                | 522                    | 565                   | 66130                   | -39                                                       | -38                                                    | -7420                                                 |
| 1e-OF             | 622                    | 666                   | 87100                   | 2e                | 572                    | 609                   | 105710                  | -50                                                       | -57                                                    | 18610                                                 |
| 1f-OF             | 666                    | 701                   | 104680                  | 2f                | 598                    | 642                   | 82670                   | -68                                                       | -59                                                    | -22010                                                |

b)

| Film (in PMMA) | $\lambda_{1,abs}$ (nm) | $\lambda_{1,em}$ (nm) | Film (in PMMA) | $\lambda_{2,abs}$ (nm) | $\lambda_{2,em}$ (nm) | $\Delta\lambda_{abs} = \lambda_{2,abs} - \lambda_{1,abs}$ | $\Delta\lambda_{em} = \lambda_{2,em} - \lambda_{1,em}$ |
|----------------|------------------------|-----------------------|----------------|------------------------|-----------------------|-----------------------------------------------------------|--------------------------------------------------------|
| 1a-OF          | 547                    | 601                   | 2a             | 495                    | 563                   | -52                                                       | -38                                                    |
| 1b-OF          | 586                    | 631                   | 2b             | 517                    | 589                   | -69                                                       | -42                                                    |
| 1c-OF          | 433                    | -                     | 2c             | 415                    | 503                   | -18                                                       | -                                                      |
| 1d-OF          | 539                    | 609                   | 2d             | 493                    | 573                   | -46                                                       | -36                                                    |
| 1e-OF          | 603                    | 677                   | 2e             | 549                    | 614                   | -54                                                       | -63                                                    |
| 1f-OF          | 655                    | 700                   | 2f             | 568                    | 640                   | -87                                                       | -60                                                    |



## 14.2 Measurement of molar absorption coefficient of 1a-OF-1f-OF and 2a-2f.

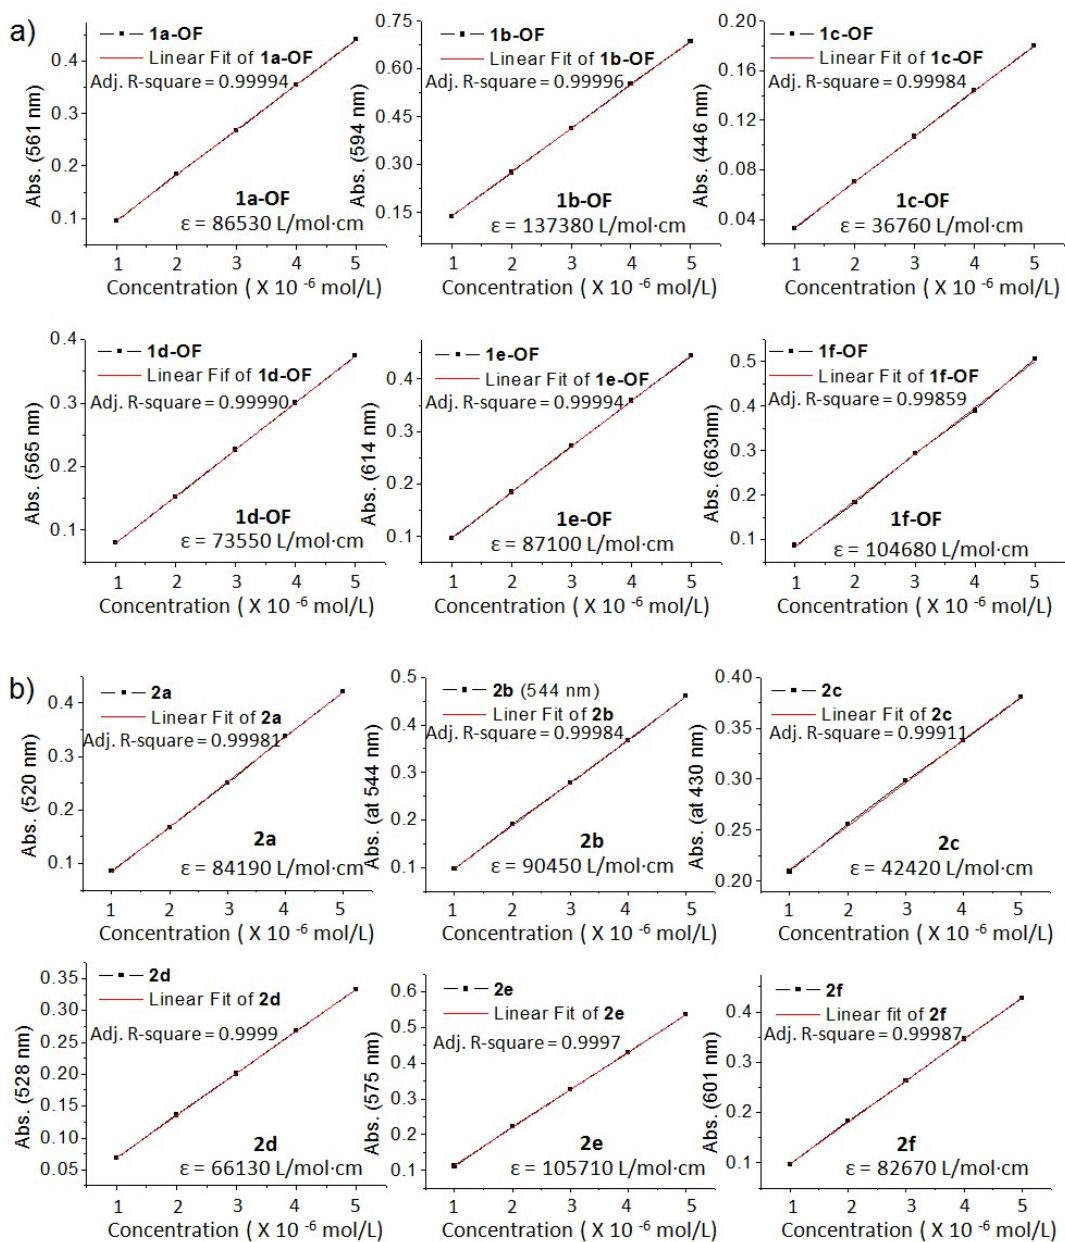

**Figure S14.** Plots of molar absorption coefficient for (a) 1a-OF-1f-OF and (b) 2a-2f in DCM.

### 14.3 Fluorescent lifetime measurements of 1a-OF-1f-OF and 2a-2f.

**Table S3.** Fluorescence lifetime of **1a-OF** to **1f-OF** in DCM solutions ( $5.0 \times 10^{-5}$  M) and PMMA films (1.0 % weight percent). <sup>a)</sup>  $\lambda_{\text{ex}} = 400$  nm. <sup>b)</sup>  $\lambda_{\text{ex}} = 375$  nm.

|              |                        | $\tau_1(\text{ns})$ | $\tau_2(\text{ns})$ | $\tau_{\text{avg}}(\text{ns})$ | $\chi^2$ |
|--------------|------------------------|---------------------|---------------------|--------------------------------|----------|
| <b>1a-OF</b> | solution <sup>a)</sup> | 0.34                | 2.54                | 0.58                           | 1.363    |
|              | film <sup>a)</sup>     | 0.94                | 2.17                | 1.38                           | 1.119    |
| <b>1b-OF</b> | solution <sup>a)</sup> | 0.61                | 3.25                | 1.36                           | 1.653    |
|              | film <sup>a)</sup>     | 0.72                | 2.59                | 1.03                           | 1.402    |
| <b>1c-OF</b> | solution <sup>a)</sup> | 0.26                | 2.59                | 0.49                           | 1.309    |
|              | film <sup>a)</sup>     | 0.71                | 2.25                | 1.60                           | 1.253    |
| <b>1d-OF</b> | solution <sup>a)</sup> | 0.30                | 2.73                | 0.56                           | 1.381    |
|              | film <sup>a)</sup>     | 0.70                | 1.84                | 1.10                           | 1.253    |
| <b>1e-OF</b> | solution <sup>b)</sup> | 1.84                | -                   | 1.84                           | 1.643    |
|              | film <sup>a)</sup>     | 2.08                | 14.1                | 2.27                           | 1.395    |
| <b>1f-OF</b> | solution <sup>b)</sup> | 3.67                | -                   | 3.67                           | 1.419    |
|              | film <sup>a)</sup>     | 2.29                | 15.73               | 2.56                           | 1.182    |

**Table S4.** Fluorescence lifetime of **2a** to **2f** in DCM solutions ( $5.0 \times 10^{-5}$  M) and PMMA films (1.0 % weight percent). <sup>a)</sup> $\lambda_{\text{ex}} = 400$  nm. <sup>b)</sup> $\lambda_{\text{ex}} = 375$  nm.

|           |                        | $\tau_1(\text{ns})$ | $\tau_2(\text{ns})$ | $\tau_{\text{avg}}(\text{ns})$ | $\chi^2$ |
|-----------|------------------------|---------------------|---------------------|--------------------------------|----------|
| <b>2a</b> | solution <sup>b)</sup> | 1.70                | -                   | 1.70                           | 1.991    |
|           | film <sup>a)</sup>     | 1.99                | 4.23                | 2.71                           | 1.378    |
| <b>2b</b> | solution <sup>b)</sup> | 1.53                | -                   | 1.53                           | 1.577    |
|           | film <sup>a)</sup>     | 1.14                | 2.53                | 1.74                           | 1.360    |
| <b>2c</b> | solution <sup>b)</sup> | 1.53                | -                   | 1.53                           | 1.790    |
|           | film <sup>a)</sup>     | 0.97                | 2.22                | 1.62                           | 1.147    |
| <b>2d</b> | solution <sup>b)</sup> | 1.38                | -                   | 1.38                           | 2.381    |
|           | film <sup>a)</sup>     | 1.82                | 3.59                | 2.31                           | 1.108    |
| <b>2e</b> | solution <sup>b)</sup> | 3.27                | -                   | 3.27                           | 1.722    |
|           | film <sup>a)</sup>     | 1.93                | 4.06                | 2.29                           | 1.234    |
| <b>2f</b> | solution <sup>b)</sup> | 2.56                | -                   | 2.56                           | 1.445    |
|           | film <sup>a)</sup>     | 1.08                | 2.22                | 1.81                           | 1.704    |

**15. Fluorescent photographs of solid powders of 1a-OF-1f-OF and 2a-2f**

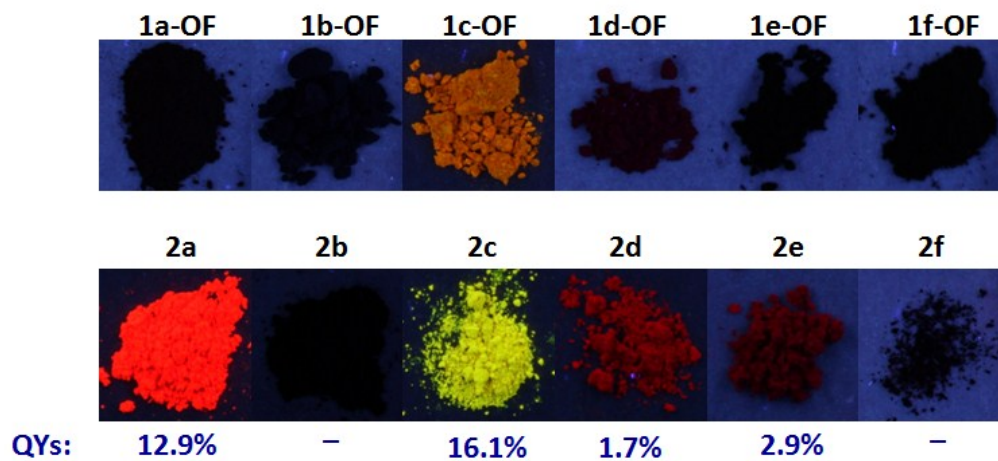

**Figure S15.** Fluorescent photographs of solid powder of **1a-OF-1f-OF** (above) and **2a-2f** (below) under 365 nm handheld UV lamp, and the absolute fluorescence quantum yields of **2a**, **2c**, **2d** and **2e**.

## 16. Solvent polarity effects on optical properties of 2a-2f

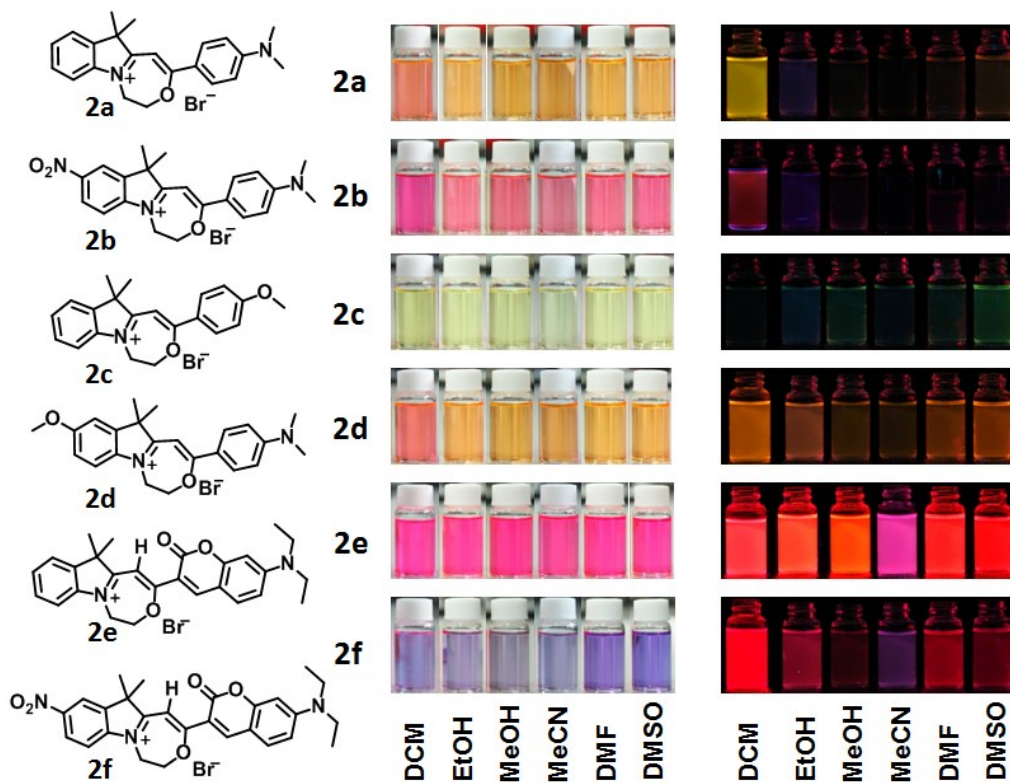

**Figure S16.** Structures and photographs of **2a-2f** in different solvents ( $1.0 \times 10^{-5}$  M) under visible and UV light by 365 nm handheld UV lamp.

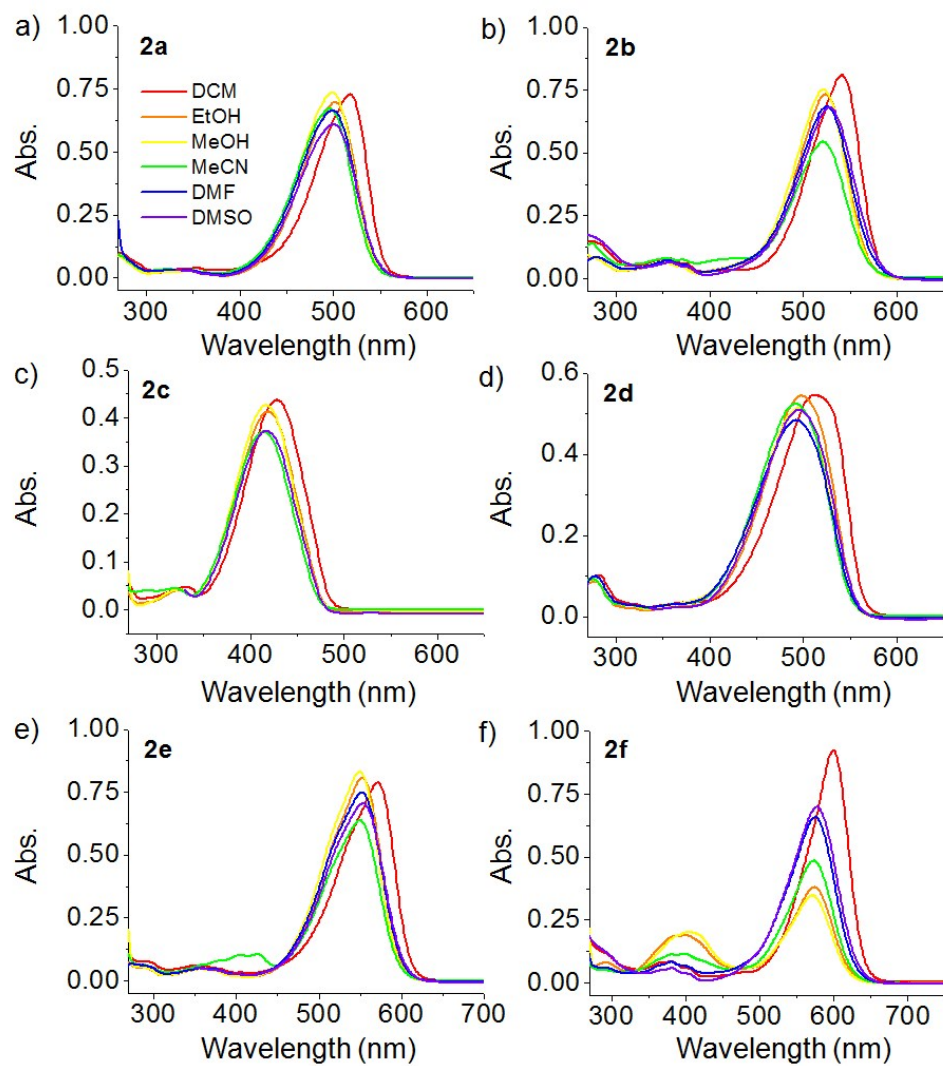

**Figure S17.** UV-Vis spectra of **2a-2f** in different solvents ( $1.0 \times 10^{-5}$  M).

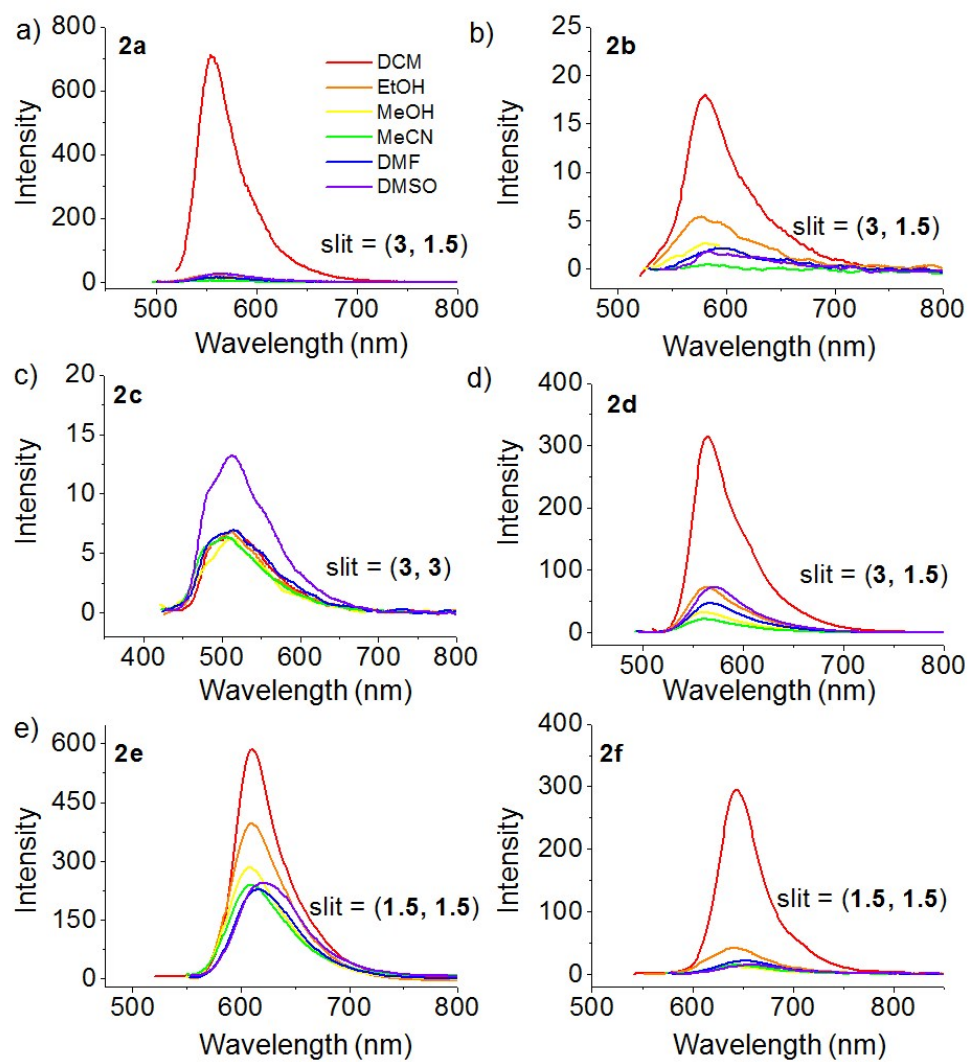

**Figure S18.** Fluorescence emission spectra of **2a-2f** in different solvents ( $1.0 \times 10^{-5}$  M).

## 17. Photographs, UV-Vis spectra and fluorescent spectra of 2a-2f in PMMA with different weight percent

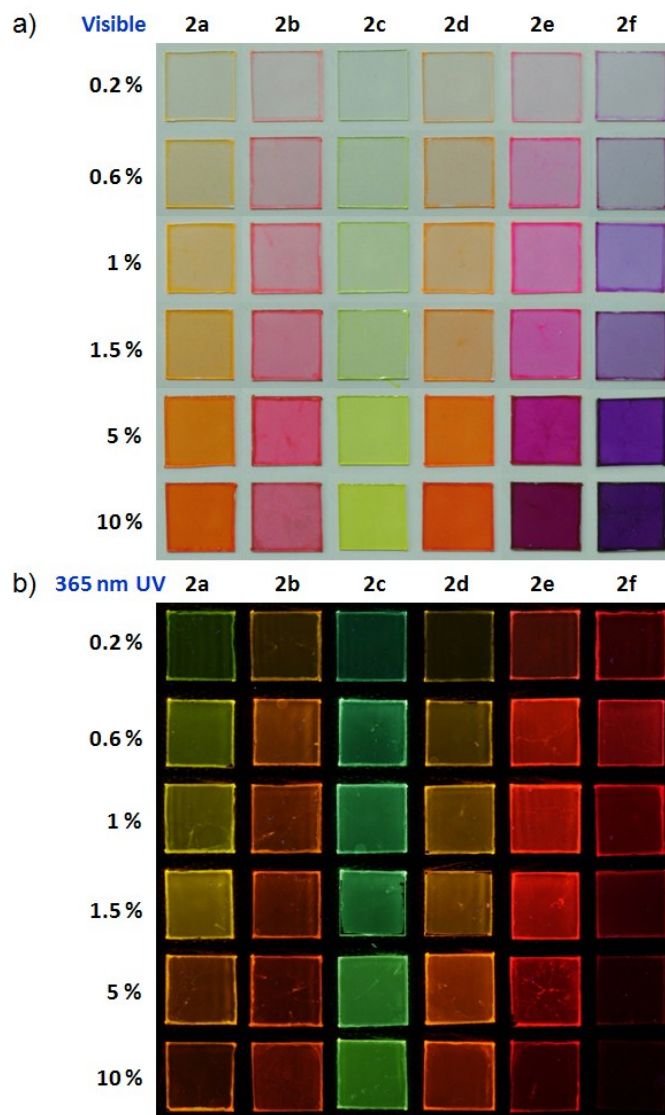

**Figure S19.** Photographs of spin-coated **2a-2f** PMMA films with weight percent of 0.2%, 0.6%, 1%, 1.5%, 5% and 10% respectively (a) under visible light and (b) 365 nm handheld UV lamp.



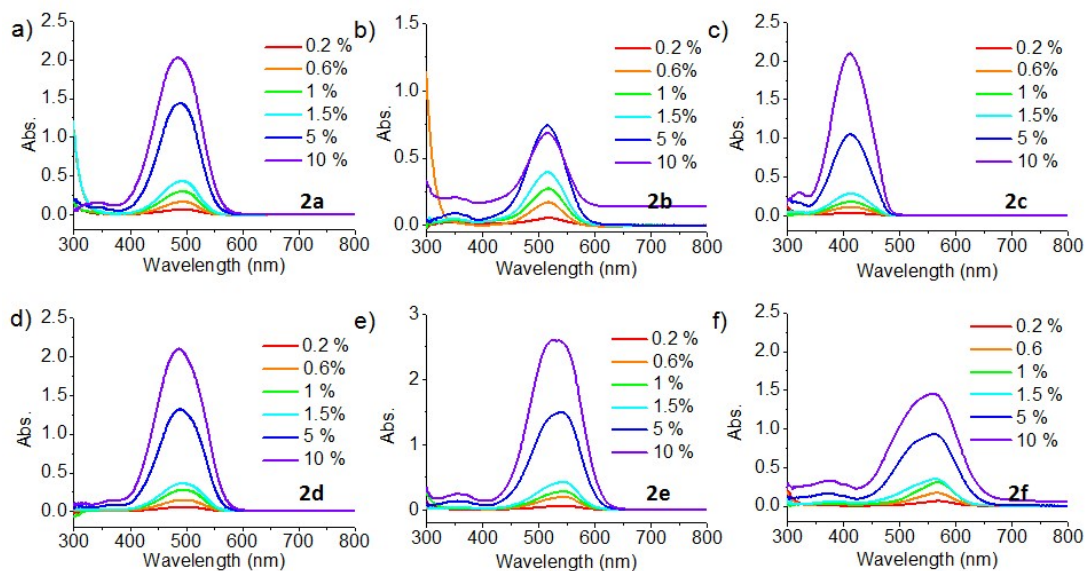

**Figure S20.** (a) - (f) UV-Vis spectra of spin-coated **2a-2f** PMMA films with weight percent of 0.2%, 0.6%, 1%, 1.5%, 5% and 10% respectively.

**2b** is not fully soluble when the weight percent reaches 10%, so the baseline increased.

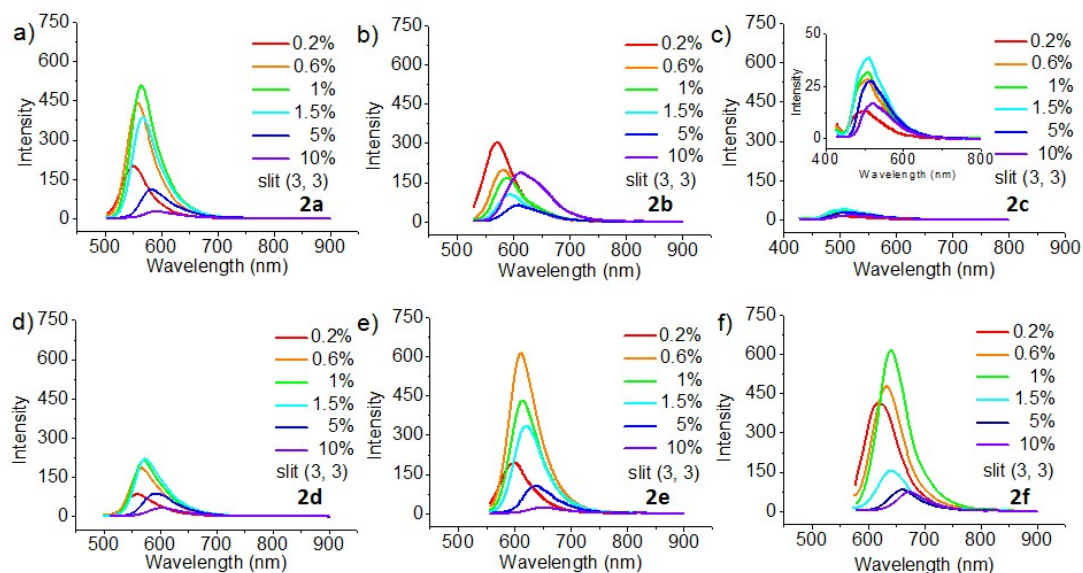

**Figure S21.** (a) - (f) Fluorescence spectra of **2a-2f** in PMMA films by spinning coating of different weight percent (0.2%, 0.6%, 1%, 1.5%, 5% and 10%).

## 18. Comparison of fluorescence quantum efficiency of **2a** and **2c** with I<sup>-</sup>, Br<sup>-</sup> and PF<sub>6</sub><sup>-</sup>

**Synthesis of **2a** and **2c** with different anions (I<sup>-</sup> or PF<sub>6</sub><sup>-</sup>):** **2a** (I<sup>-</sup>)/**2c** (I<sup>-</sup>) were obtained by the reaction of **1a**/**1c** with CH<sub>3</sub>I in DMSO at 120 °C. **2a** (PF<sub>6</sub><sup>-</sup>)/**2c** (PF<sub>6</sub><sup>-</sup>) were obtained by counterion exchange with the bromide anions. The synthetic method is that we synthesized the crude product **2a** (Br<sup>-</sup>) and **2c** (Br<sup>-</sup>) in DMSO, respectively and added 15 equivalents of ammonium hexafluorophosphate into the DMSO solution. After stirring 20 minutes and adding saturated saline, the crude product **2a** and **2c** with hexafluorophosphate anion precipitated out. The product were purified by chromatography (dichloromethane / methanol = 60 / 1).

**Structures confirmation of **2a** (PF<sub>6</sub><sup>-</sup>) and **2c** (PF<sub>6</sub><sup>-</sup>):** The <sup>1</sup>H NMR spectra in Fig. S19 indicated that **2a** (PF<sub>6</sub><sup>-</sup>) and **2c** (PF<sub>6</sub><sup>-</sup>) may be obtained, but the anions can't be determined. Moreover, compared to **2a** (Br<sup>-</sup>) and **2c** (Br<sup>-</sup>), the significantly reduced mobile phase polarity when doing chromatography, as well as 1~4 nm red shift of absorption spectra confirmed that we indeed obtained product **2a** and **2c** with PF<sub>6</sub><sup>-</sup> and I<sup>-</sup> (Fig. S20).

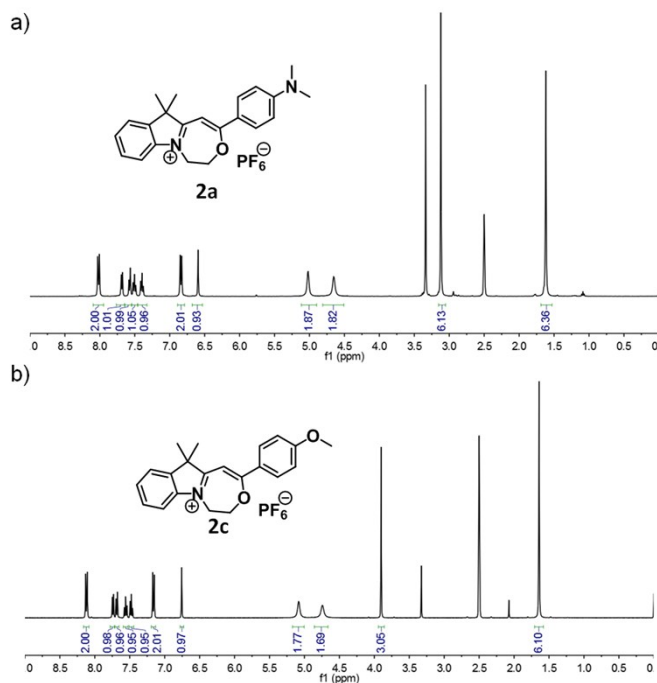

**Figure S22.** <sup>1</sup>H NMR spectra of **2a** and **2c** with hexafluorophosphate anion.

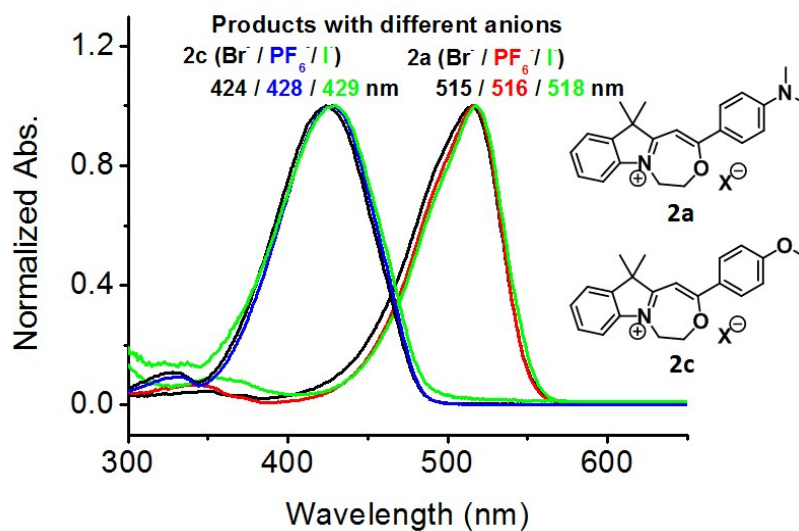

**Figure S23.** Normalized UV-Vis spectra of **2a** and **2c** with I<sup>-</sup>, Br<sup>-</sup> and PF<sub>6</sub><sup>-</sup> in dichloromethane, respectively.

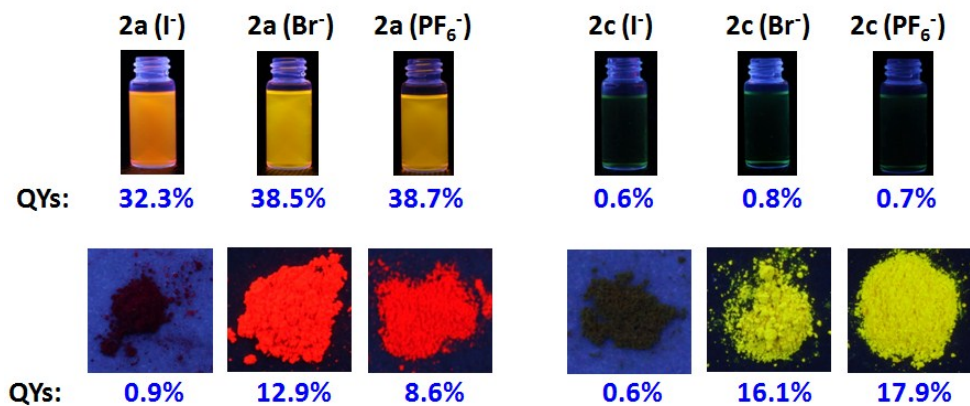

**Figure S24.** Comparison of photos and absolute fluorescence quantum yields of **2a** and **2c** with I<sup>-</sup>, Br<sup>-</sup> and PF<sub>6</sub><sup>-</sup> in dichloromethane and in solid states, respectively.

## 19. Theoretical calculations of energy levels of frontier molecular orbitals for ground states of **2a-2f**

All the Density functional theory (DFT) calculations were carried out using the GAUSSIAN 09 series of programs.<sup>S2</sup> DFT and B3LYP with a standard 6-31g (d) basis set were used for geometry optimizations of ground states of **2a-2f**. And the vibrational spectrum of each molecule was calculated at the same level of theory to ensure that all of the structures correspond to the true minima of the potential energy surface.

|                      | <b>2a</b> | <b>2b</b> | <b>2c</b> | <b>2d</b> | <b>2e</b> | <b>2f</b> |
|----------------------|-----------|-----------|-----------|-----------|-----------|-----------|
| <b>LUMO (eV)</b>     | -5.30     | -5.68     | -5.62     | -5.16     | -5.42     | -5.74     |
| <b>HOMO (eV)</b>     | -8.17     | -8.48     | -8.83     | -7.95     | -8.03     | -8.29     |
| <b>Band gap (eV)</b> | 2.87      | 2.80      | 3.21      | 2.79      | 2.61      | 2.55      |

**Table S5.** Calculated energy levels of frontier molecular orbitals for ground states of **2a-2f**.

## 20. Photostability and thermal stability of 2a-2f

### 20.1 Measuring the photostability of 2a-2f in dichloromethane.

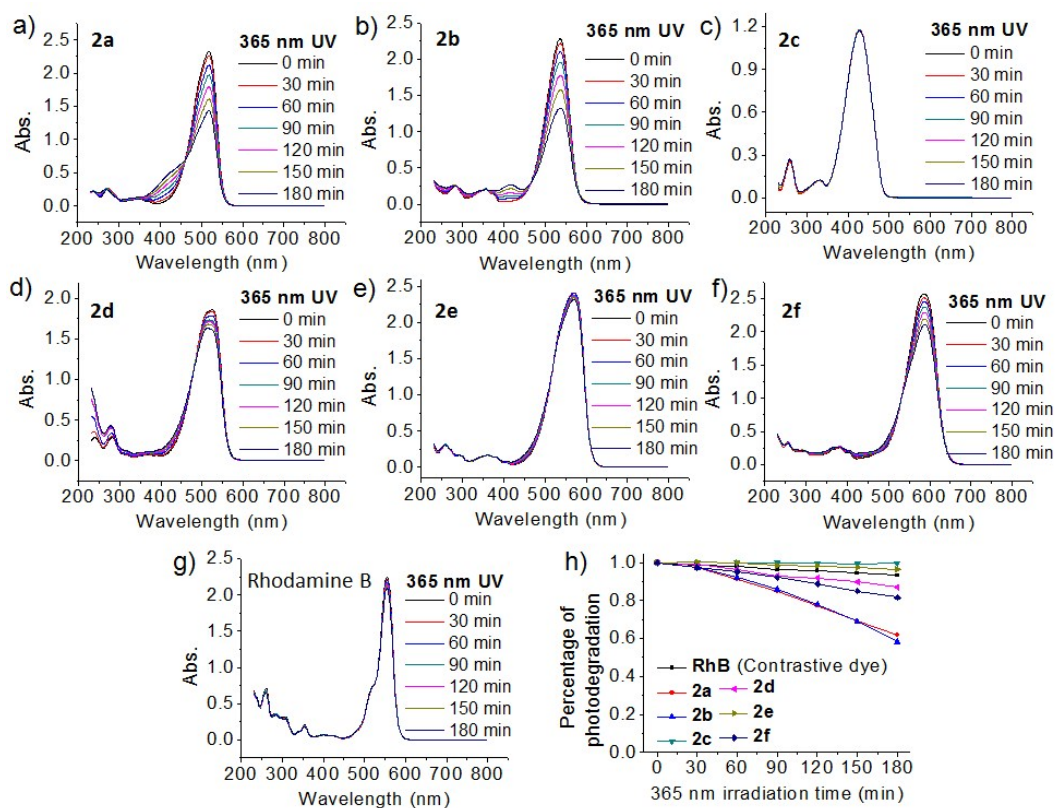

**Figure S25.** Measuring the photostability of **2a-2f**. (a) ~ (g) UV-Vis absorption spectra of **2a-2f** and the Rhodamine B (a commercial dye) in dichloromethane ( $2.0 \times 10^{-5}$  M) with different UV irradiation time by 365 nm hand hold UV lamp (power: 12 W, distance: 5 cm). (h) Remaining percentage of the dyes **2a-2f** and Rhodamine B after photodegradation.

## 20.2 Measuring the thermal stability for solids of 2a-2f.

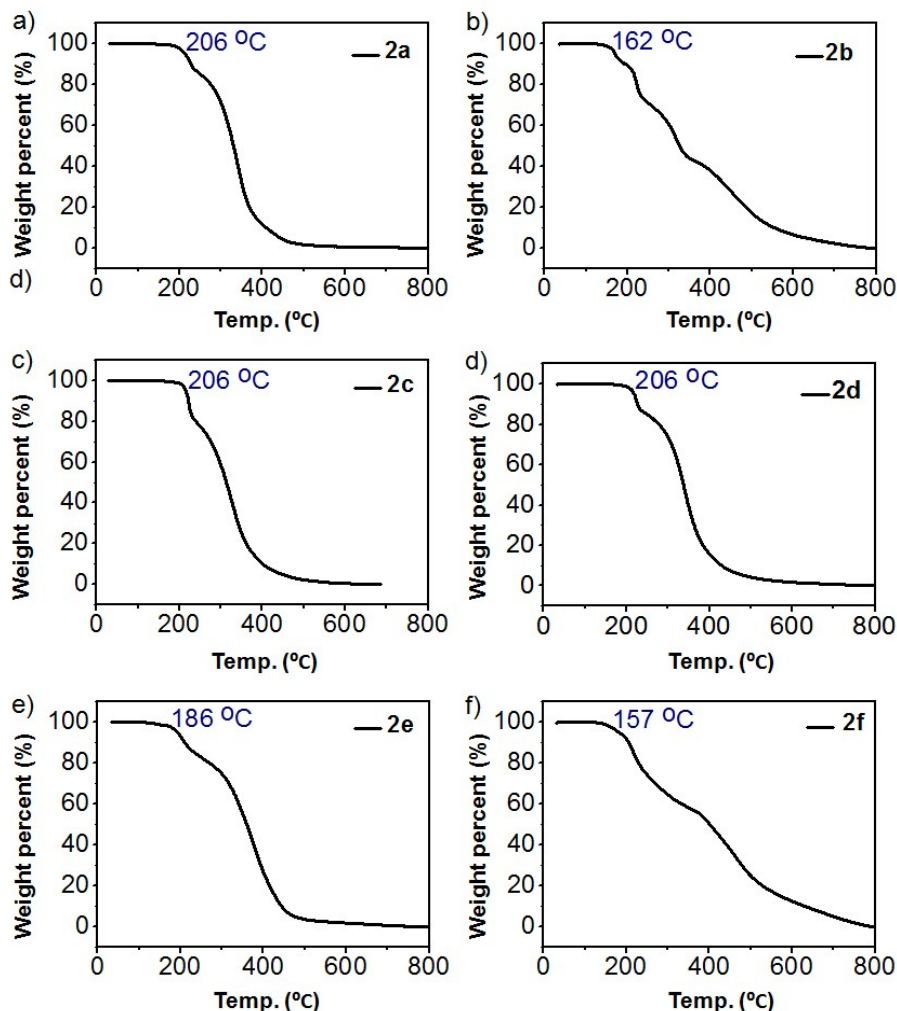

**Figure S26.** Measuring thermal stability of **2a-2f**'s solids. (a) ~ (f) Thermo gravimetric analysis (TGA) of **2a-2f**.

For thermal stability, the starting decomposition temperatures for **2a**, **2b**, **2c**, **2d**, **2e** and **2f** were 206 °C, 162 °C, 206 °C, 206 °C, 186 °C and 157 °C, respectively. It indicates that these heterocycles have moderate thermal stability to resist high temperature. The results suggest that in these molecules, the coumarin group of the molecule has a weak thermal stability than the phenyl groups of the molecules (i.e., **2e** and **2f** vs. **2a**, **2b** and **2d**), and the nitro group on the indole subunit will relatively decrease the thermal stability of molecules (i.e., **2b** vs. **2a**, **2f** vs. **2e**).

## 21. HRMS spectra of 2b-OH and UV-Vis spectra measurement for switch property of 2b

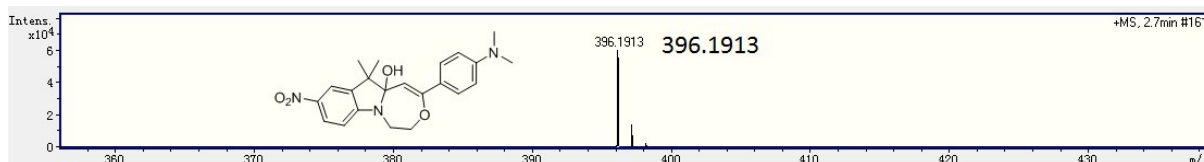

**Figure S27.** HRMS spectrum of **2b-OH** from the reaction of **2b** ( $4.0 \times 10^{-4}$  M in DMSO) and aqueous solution of  $\text{Na}_2\text{CO}_3$ .

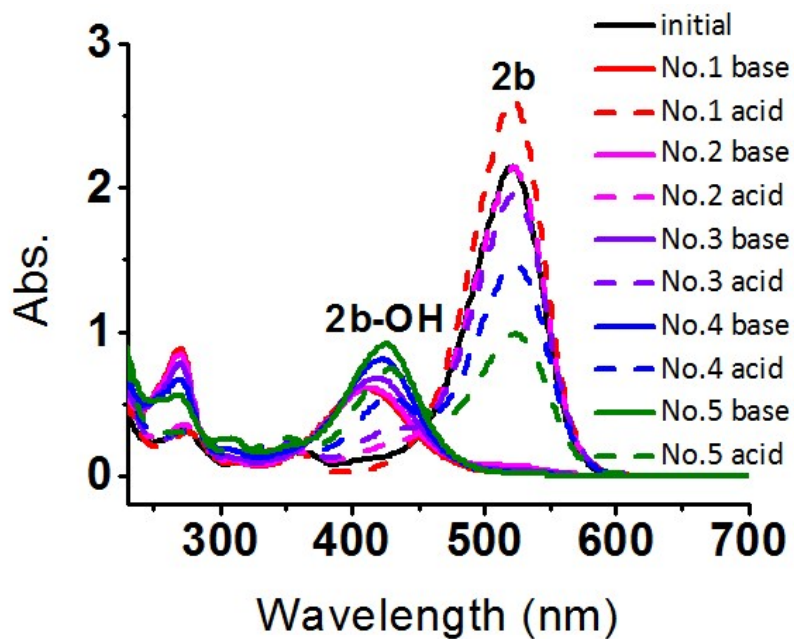

**Figure S28.** UV-Vis spectra of **2b** in DMSO ( $4.0 \times 10^{-4}$  M) after repeated addition of aqueous solution of  $\text{Na}_2\text{CO}_3$  and HCl.

## 22. Measurement of the pKa' of 2a-2f

The pKa'(s) of these heterocycles were tested by measuring the UV-Vis spectra of these heterocycles in buffers containing 1% DMSO with pH between 6 and 13. Although **2a-2f** are responsive to OH<sup>-</sup>, they are not really weak acid and with no dissociation equilibrium. Considering that they could react with OH<sup>-</sup> and are Lewis acid, therefore we use pKa'(s) to evaluate their acidity and the ability to react with base.

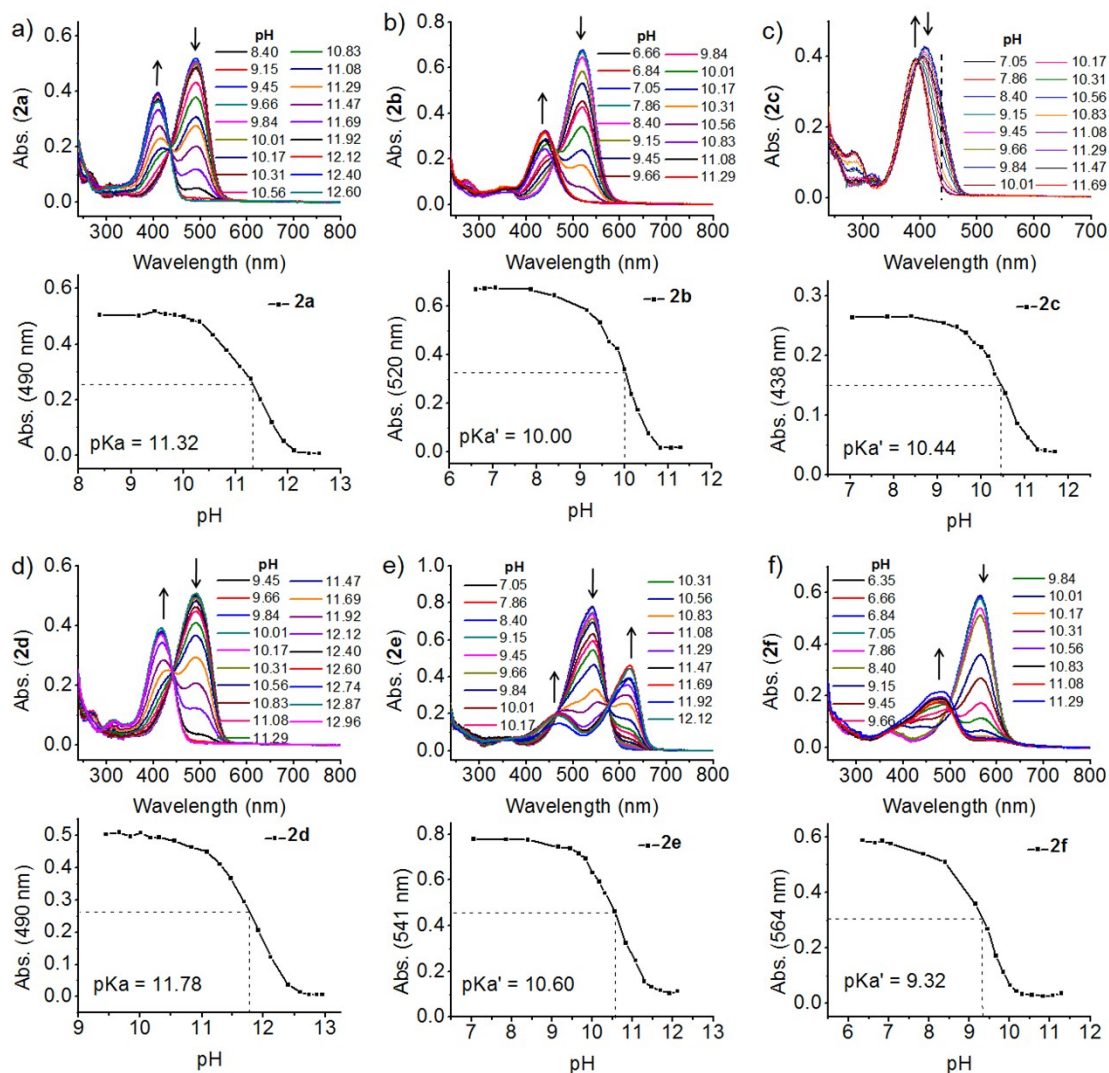

**Figure S29.** (a) ~ (f) UV-Vis absorption spectra of **2a-2f** in buffers with pH between 6.35 and 12.96 ( $C = 1.0 \times 10^{-5}$  M) (above) and the intensity changes at its  $\lambda_{\max}$  (**2a-2f**) with pH of buffers (below).



## 23. HRMS spectra monitoring reaction of **2b** with amines

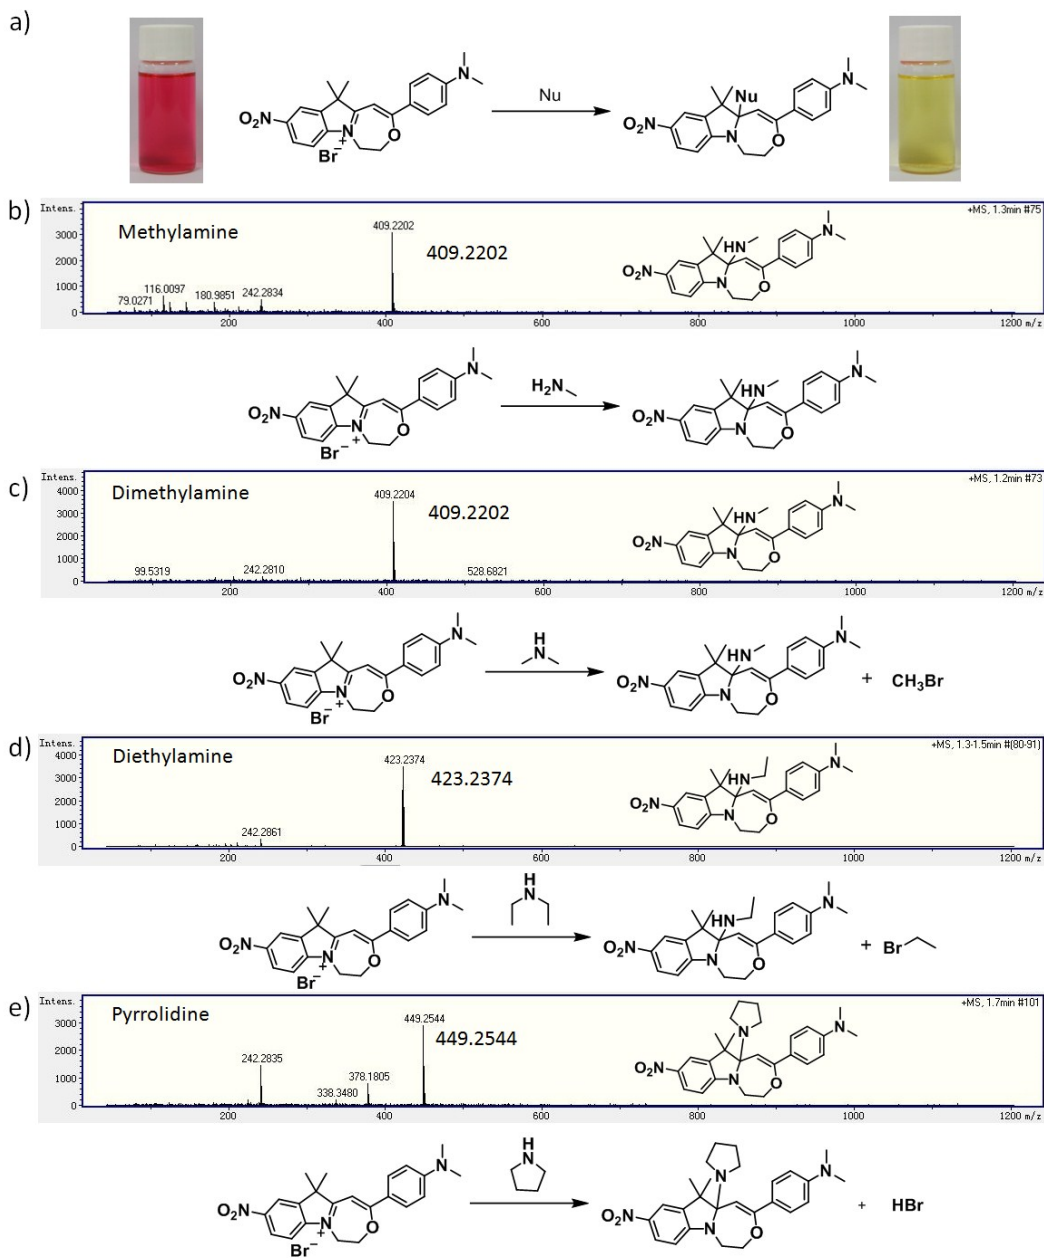

**Figure S30.** **2b** in MeCN reacting with multiple nucleophilic reagents. (a) Photos and structural illustration of **2b** reacting with nucleophilic reagents. HRMS spectra of **2b** reacting with (b) methylamine, (c) dimethylamine, (d) diethylamine and (e) pyrrolidine.

## 24. The selectivity to pH of **2b** over reactive nitrogen and oxygen species

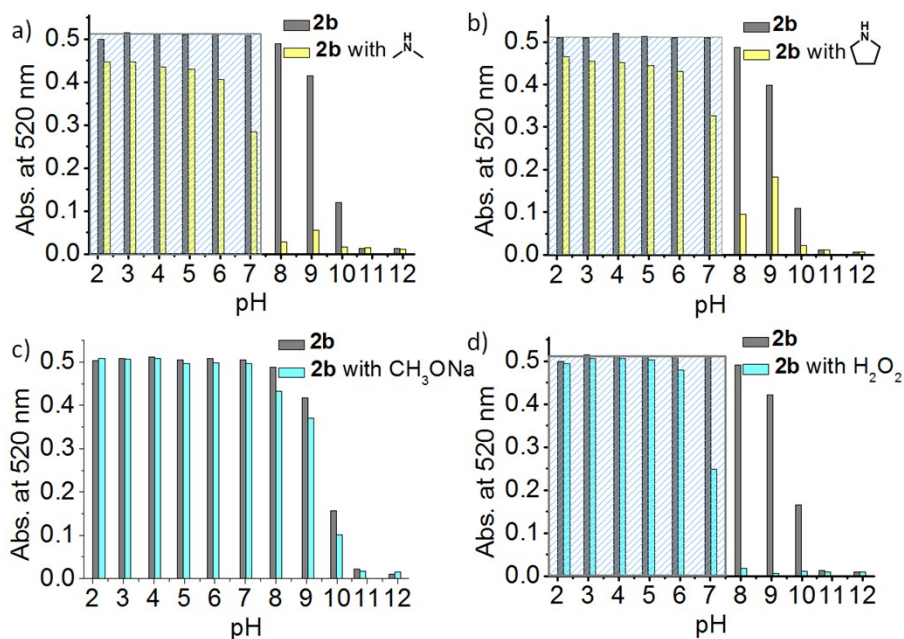

**Figure S31.** Effect of pH on the reaction of **2b** with nucleophilic reagents and hydrogen peroxide. The maximum absorption variation at 520 nm of **2b**'s buffer solutions ( $1.0 \times 10^{-5}$  M) of different pH values before (grey bar) and after (light yellow or light cyan bar) adding (a) dimethylamine ( $1.45 \times 10^{-4}$  M), (b) pyrrolidine ( $1.81 \times 10^{-4}$  M), (c) sodium methoxide ( $2.44 \times 10^{-4}$  M) and (d) hydrogen peroxide ( $1.50 \times 10^{-4}$  M).

## 25. The cytotoxicity of 2e

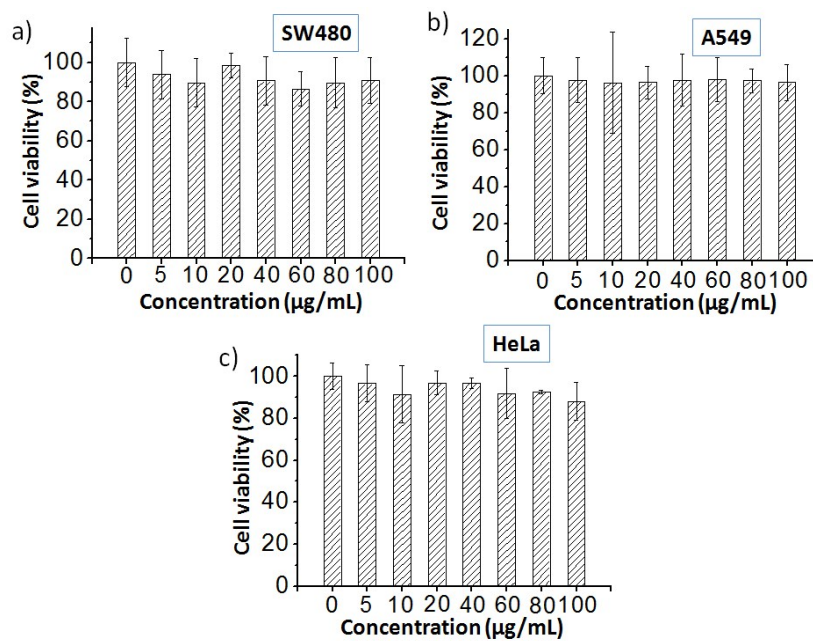

**Figure S32.** Effects of 2e at varied concentrations on the viability of (a) SW480, (b) A549 and (c) HeLa cells.

## 26. Effect of extracellular fluctuations under oxidative stress and with drug treatment on endocytosis efficiency and fluorescence of 2e

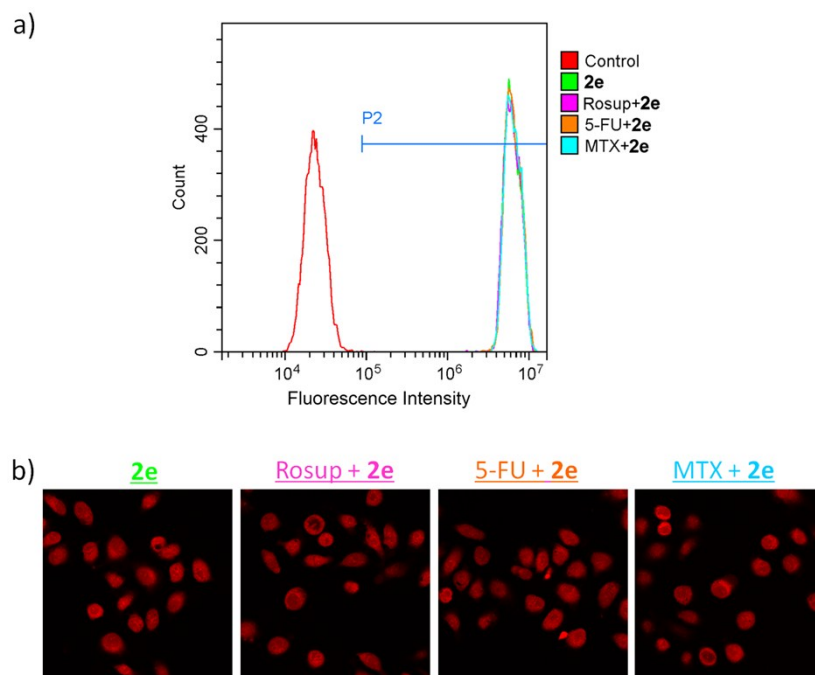

**Figure S33.** Measurement for effect of extracellular fluctuations of oxidative stress (Rosup) and drug treatment (5-fluorouracil (5-FU) and methotrexate (MTX)) on endocytosis efficiency of 2e in HeLa cells by (a) flow cytometry and (b) CLSM.

## 27. $^1\text{H}$ NMR and $^{13}\text{C}$ NMR spectra

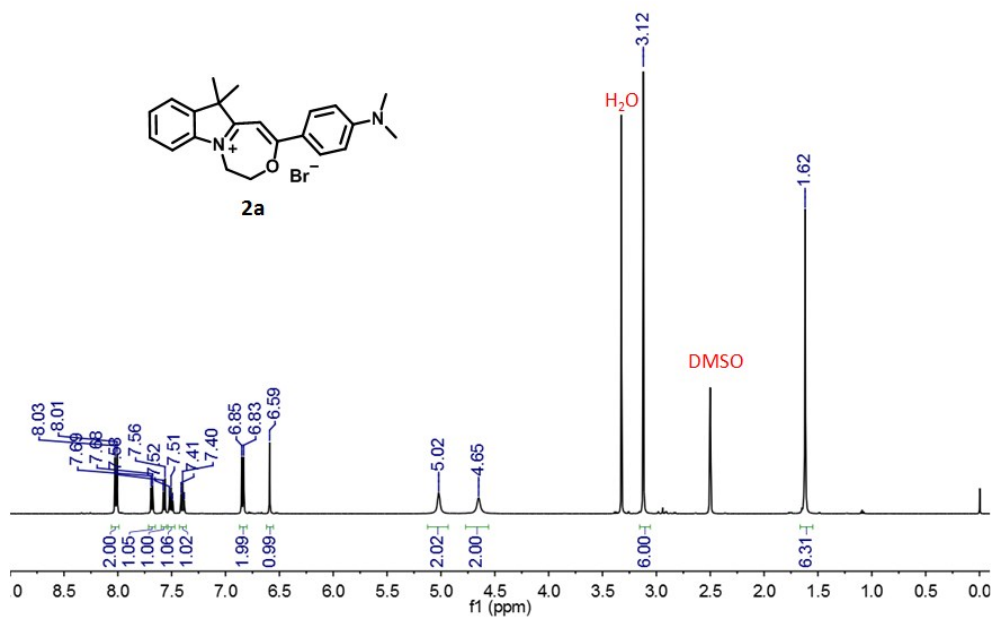

**Figure S34.**  $^1\text{H}$  NMR spectrum of **2a** (400 MHz,  $\text{DMSO}-d_6$ ).

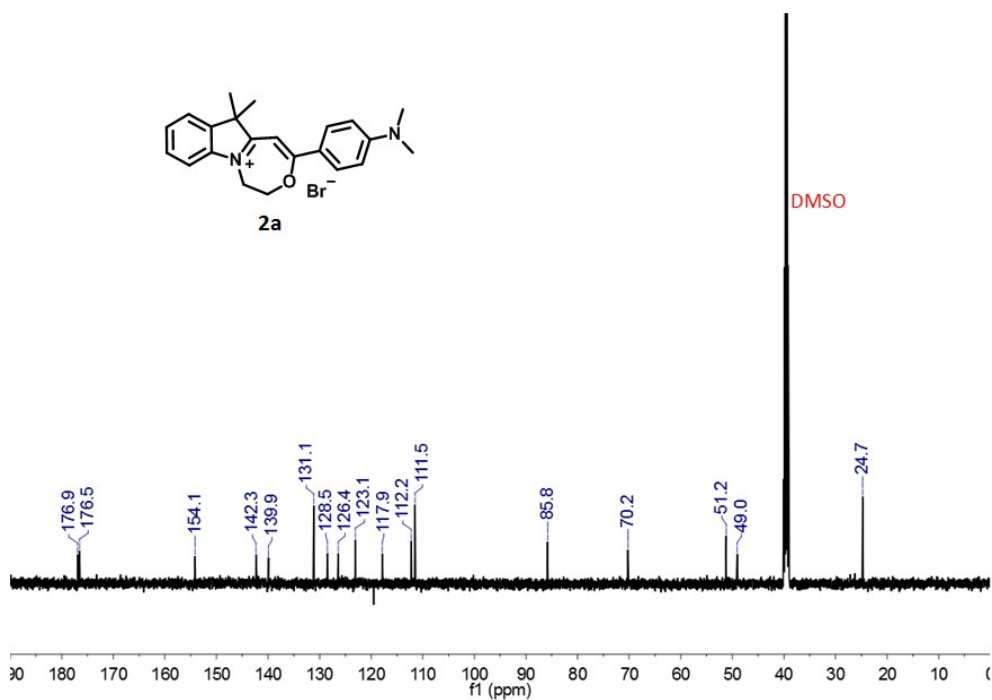

**Figure S35.**  $^{13}\text{C}$  NMR spectrum of **2a** (125 MHz,  $\text{DMSO}-d_6$ ).

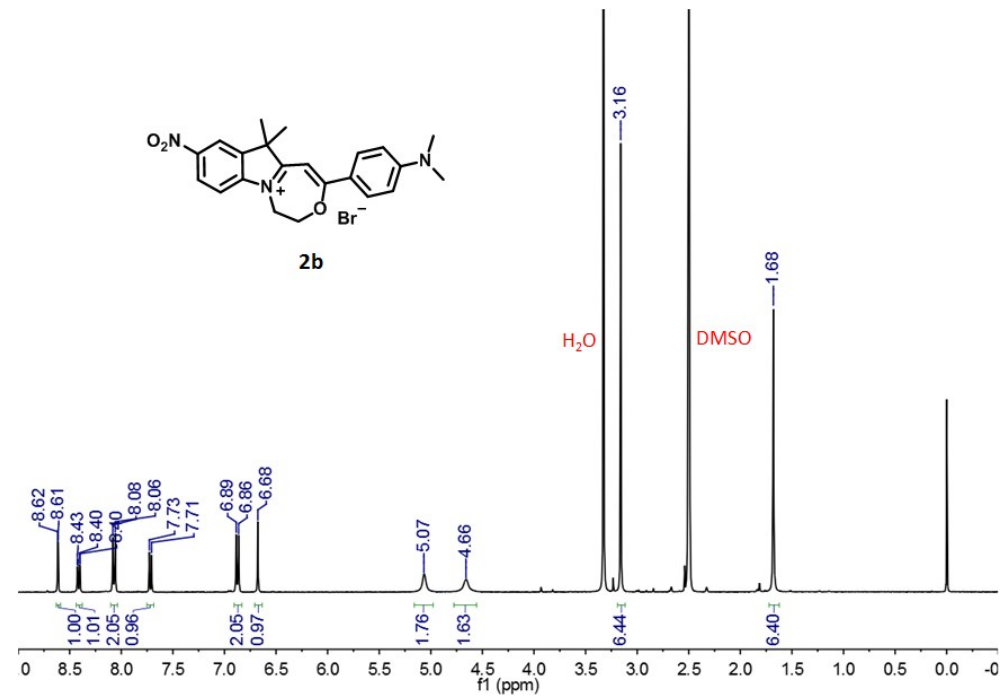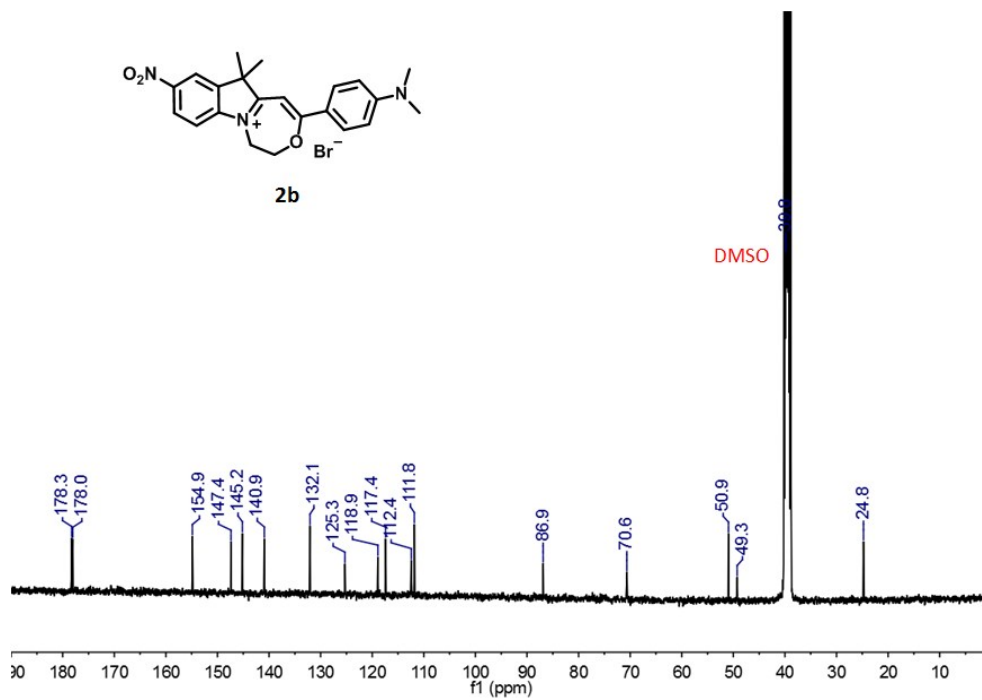

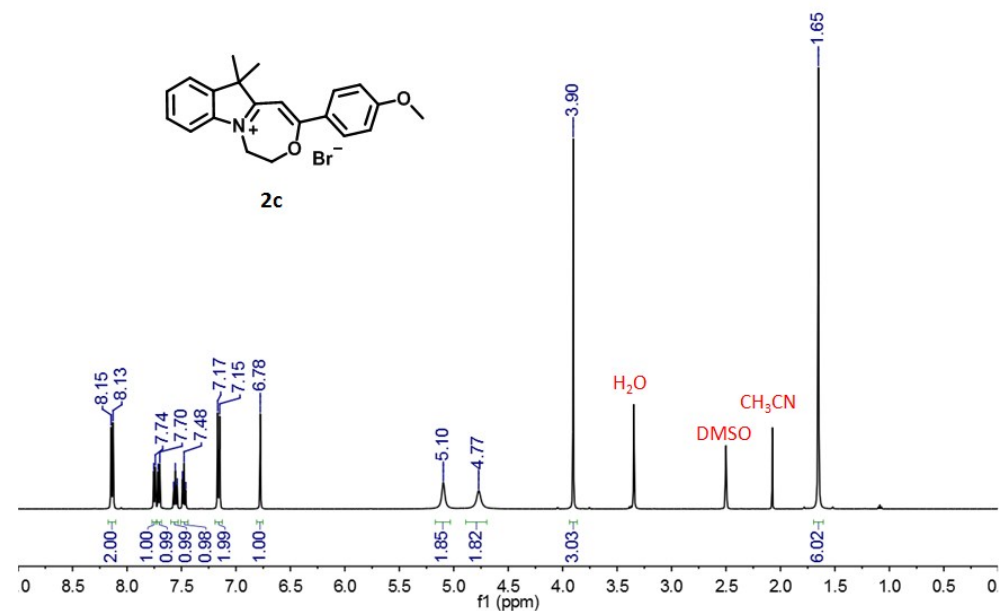

**Figure S38.** <sup>1</sup>H NMR spectrum of **2c** (500 MHz, DMSO-*d*<sub>6</sub>).

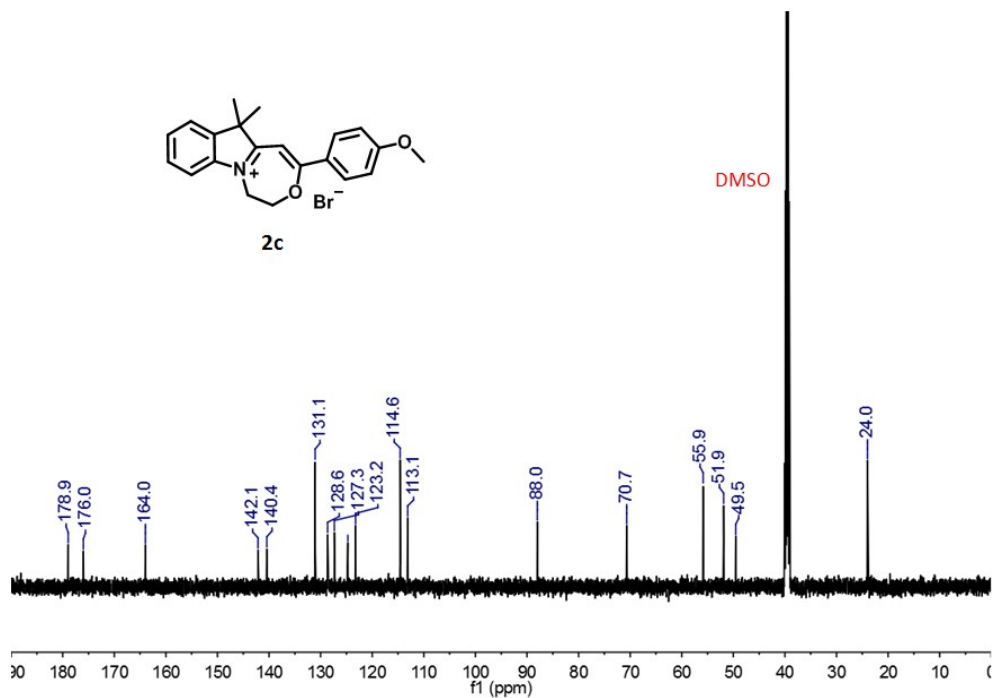

**Figure S39.** <sup>13</sup>C NMR spectrum of **2c** (100 MHz, DMSO-*d*<sub>6</sub>).

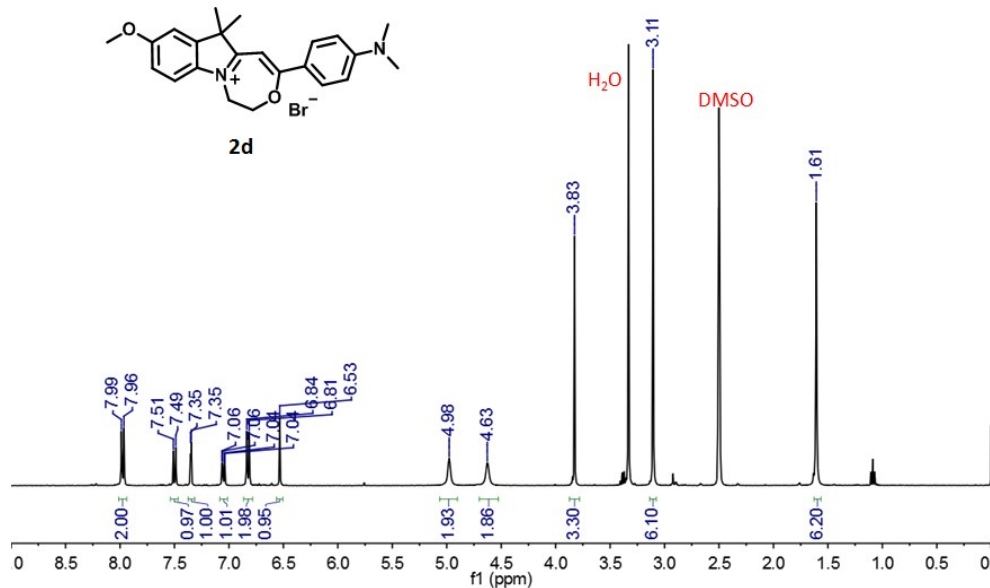

**Figure S40.** <sup>1</sup>H NMR spectrum of **2d** (400 MHz, DMSO-*d*<sub>6</sub>).

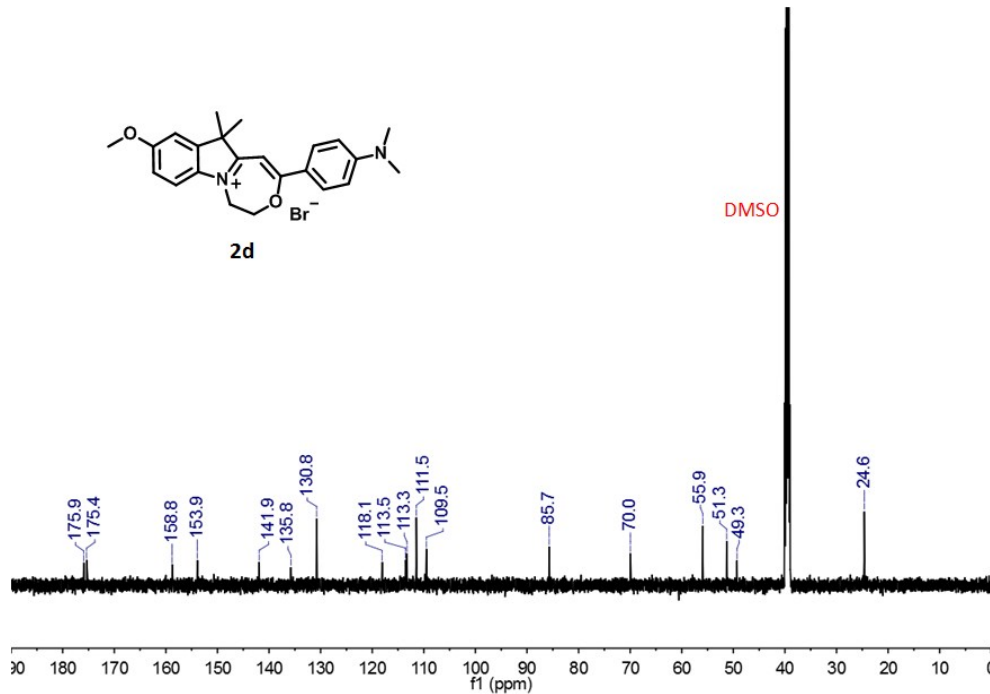

**Figure S41.** <sup>13</sup>C NMR spectrum of **2d** (126 MHz, DMSO-*d*<sub>6</sub>).



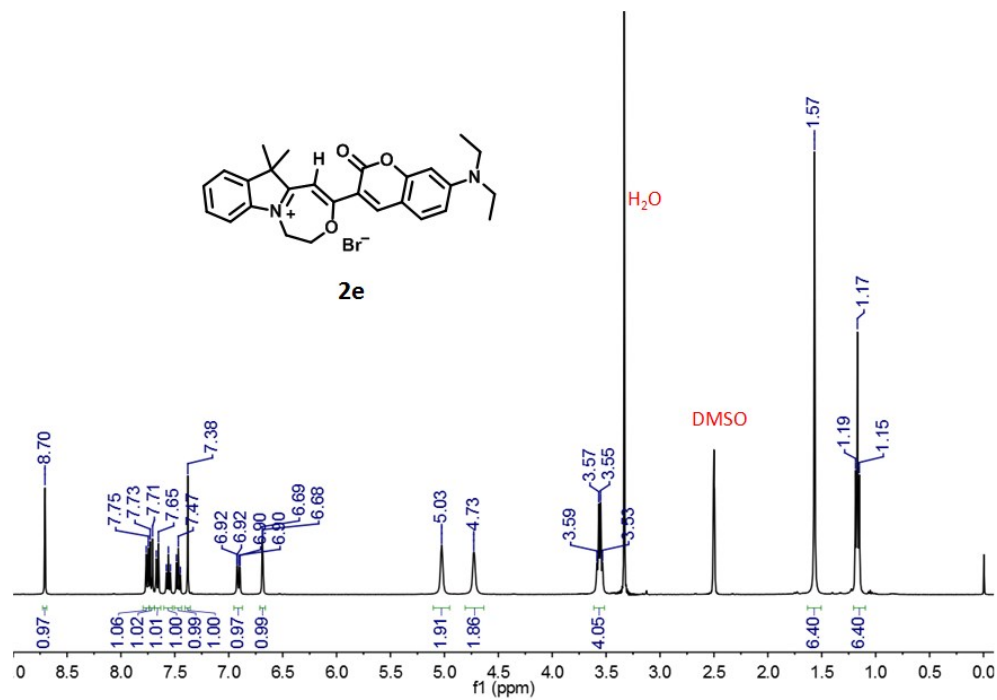

**Figure S42.** <sup>1</sup>H NMR spectrum of **2e** (400 MHz, DMSO-*d*<sub>6</sub>).

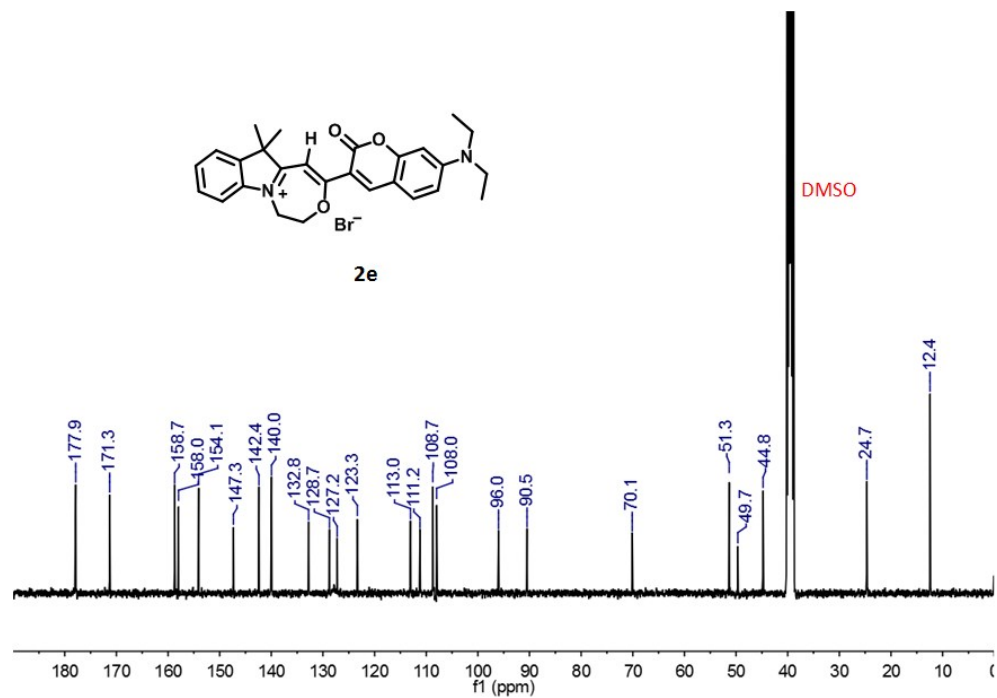

**Figure S43.** <sup>13</sup>C NMR spectrum of **2e** (100 MHz, DMSO-*d*<sub>6</sub>).

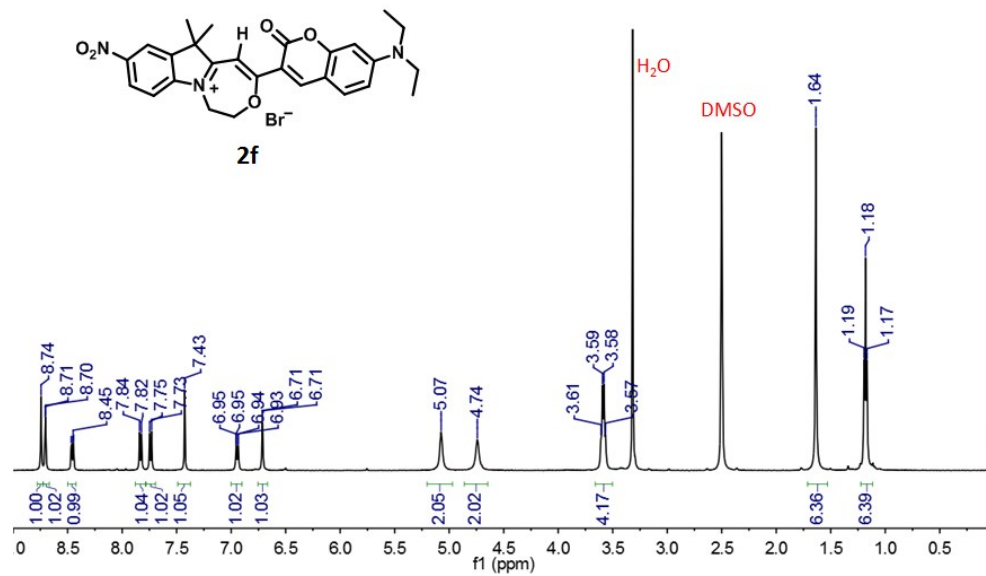

**Figure S44.**  $^1\text{H}$  NMR spectrum of **2f** (400 MHz,  $\text{DMSO-}d_6$ ).

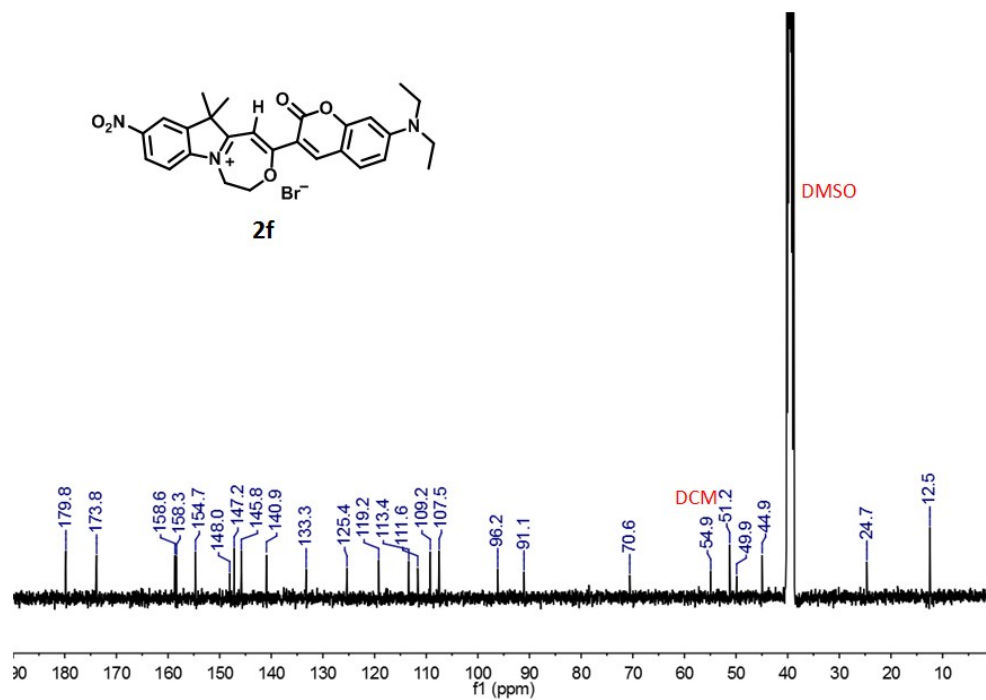

**Figure S45.**  $^{13}\text{C}$  NMR spectrum of **2f** (100 MHz,  $\text{DMSO-}d_6$ ).

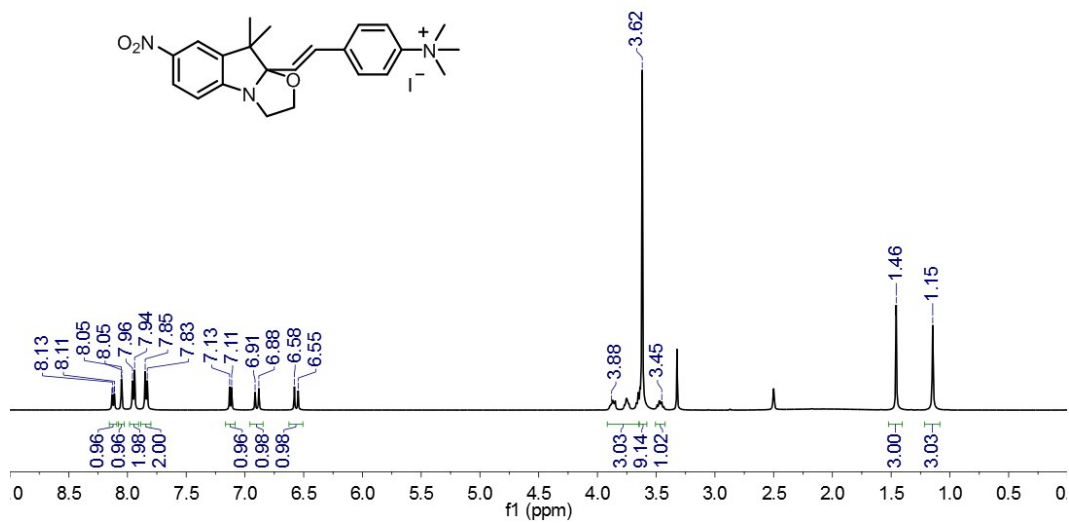

**Figure S46.** <sup>1</sup>H NMR spectrum of I (500 MHz, DMSO-*d*<sub>6</sub>).

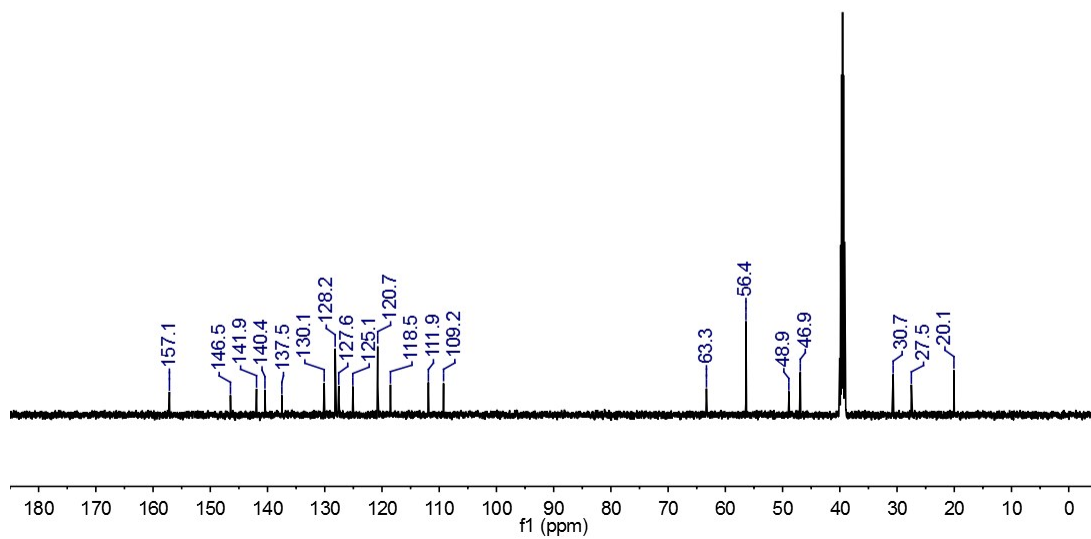

**Figure S47.** <sup>13</sup>C NMR spectrum of I (126 MHz, DMSO-*d*<sub>6</sub>).

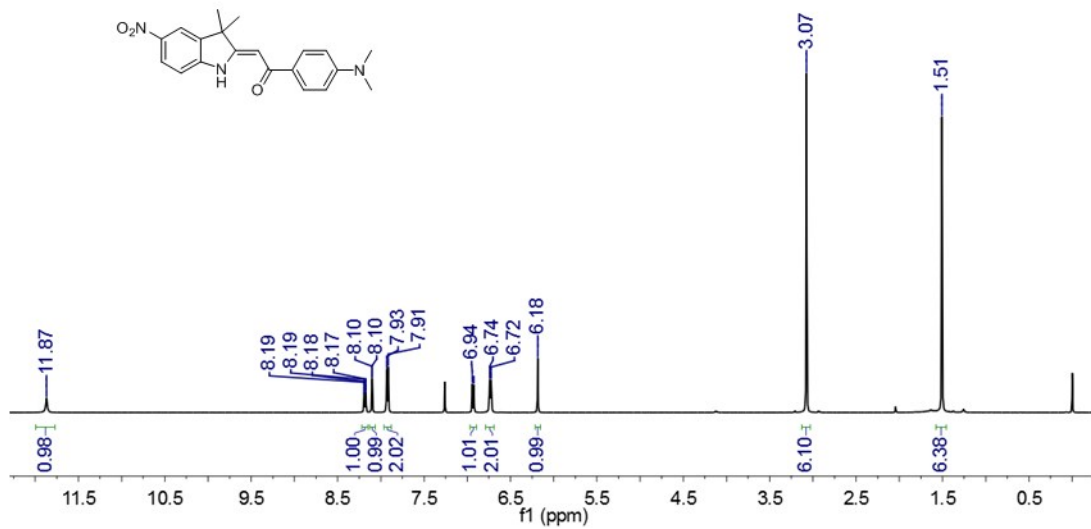

**Figure S48.**  $^1\text{H}$  NMR spectrum of **3** (500 MHz,  $\text{CDCl}_3$ ).

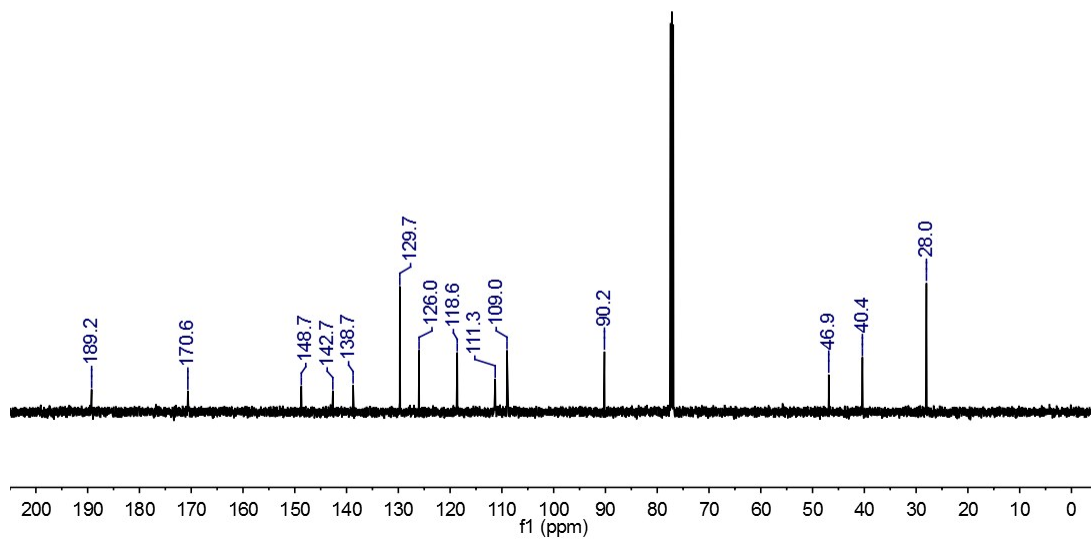

**Figure S49.**  $^{13}\text{C}$  NMR spectrum of **3** (126 MHz,  $\text{CDCl}_3$ ).

## 28. The coordination of structures

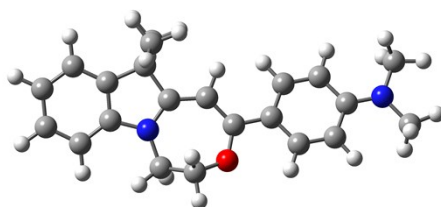

**2a**

|   |             |             |             |
|---|-------------|-------------|-------------|
| C | 3.96644271  | -0.84461912 | 0.02769471  |
| C | 5.22420769  | -1.43131355 | 0.00684497  |
| H | 5.35183437  | -2.48964129 | 0.21668254  |
| C | 6.33617190  | -0.63301272 | -0.29176304 |
| H | 7.32624972  | -1.07735822 | -0.31150529 |
| C | 6.18311135  | 0.72762128  | -0.57006790 |
| H | 7.05397665  | 1.33042151  | -0.80785382 |
| C | 4.92041045  | 1.33117088  | -0.55433545 |
| H | 4.81360075  | 2.38537008  | -0.78786729 |
| C | 3.83604206  | 0.51852484  | -0.24371694 |
| C | 2.59547058  | -1.43342156 | 0.30314615  |
| C | 2.49183760  | -1.99825062 | 1.74029233  |
| H | 2.74996617  | -1.24178293 | 2.48757711  |
| H | 3.18424190  | -2.83829710 | 1.85430058  |
| H | 1.48096806  | -2.36309372 | 1.94927842  |
| C | 2.22886357  | -2.52178367 | -0.73389371 |
| H | 1.22514359  | -2.92015410 | -0.55265215 |
| H | 2.93733390  | -3.35228136 | -0.65677430 |
| H | 2.27071316  | -2.13227941 | -1.75542108 |
| C | 1.69466020  | -0.19821514 | 0.14509035  |
| C | 0.30806565  | -0.26717361 | 0.28943225  |
| H | -0.05938517 | -1.26448837 | 0.49180783  |
| C | -0.69169836 | 0.70908749  | 0.16242701  |
| C | 0.80440199  | 2.54729053  | 0.59693041  |
| H | 0.99915686  | 2.18089257  | 1.61088621  |
| H | 0.65213571  | 3.62720769  | 0.63118663  |
| C | 1.97182127  | 2.23157856  | -0.33192523 |
| H | 1.67470107  | 2.39871244  | -1.37393758 |
| H | 2.79510384  | 2.91309819  | -0.10200920 |
| C | -2.09395956 | 0.39723140  | 0.07051516  |
| C | -2.56449119 | -0.90407767 | -0.23869201 |
| H | -1.86053463 | -1.70090971 | -0.45481533 |

|   |             |             |             |
|---|-------------|-------------|-------------|
| C | -3.90788790 | -1.18920841 | -0.32223528 |
| H | -4.21073521 | -2.19607004 | -0.57933235 |
| C | -4.89076269 | -0.17892338 | -0.10076368 |
| C | -4.41907220 | 1.13382963  | 0.19475224  |
| H | -5.12220030 | 1.93730658  | 0.37309776  |
| C | -3.07212513 | 1.40479206  | 0.27125628  |
| H | -2.75168075 | 2.41251892  | 0.50841069  |
| C | -6.68015208 | -1.81435936 | -0.45670953 |
| H | -6.36468762 | -2.14597288 | -1.45379285 |
| H | -7.76885220 | -1.83578907 | -0.42040986 |
| H | -6.30137235 | -2.52538842 | 0.28674193  |
| C | -7.20879735 | 0.60305846  | 0.02116927  |
| H | -7.13958478 | 1.03525769  | 1.02676579  |
| H | -8.20711648 | 0.18409749  | -0.10039443 |
| H | -7.08328407 | 1.40514325  | -0.71576847 |
| N | 2.45970259  | 0.87097791  | -0.15145533 |
| N | -6.21931358 | -0.45621467 | -0.17274338 |
| O | -0.44047234 | 2.02889745  | 0.12406241  |

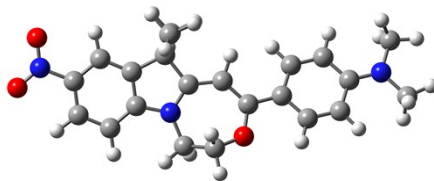

**2b**

|   |            |             |             |
|---|------------|-------------|-------------|
| C | 3.11371700 | -0.52006735 | 0.10757308  |
| C | 4.39541715 | -1.04143745 | 0.09912222  |
| H | 4.61269239 | -2.08134806 | 0.31316309  |
| C | 5.44505016 | -0.16798875 | -0.20243758 |
| C | 5.24412747 | 1.17974380  | -0.49456742 |
| H | 6.09939217 | 1.80157205  | -0.72855490 |
| C | 3.95042553 | 1.70456478  | -0.48710651 |
| H | 3.78923552 | 2.74923094  | -0.72935551 |
| C | 2.90870206 | 0.83488694  | -0.17456393 |
| C | 0.81173241 | -0.00063216 | 0.20956723  |
| C | 1.77777818 | -1.18362323 | 0.38206610  |
| C | 1.48003111 | -2.29918248 | -0.64848984 |
| H | 1.50330161 | -1.91640721 | -1.67323778 |
| H | 0.49956020 | -2.75115386 | -0.46679869 |
| H | 2.23344910 | -3.08814958 | -0.56144490 |

|   |              |              |              |
|---|--------------|--------------|--------------|
| C | 1. 70242328  | -1. 74309022 | 1. 82343857  |
| H | 2. 43977813  | -2. 54275389 | 1. 94586669  |
| H | 0. 71244077  | -2. 16226609 | 2. 03009837  |
| H | 1. 91376538  | -0. 96838604 | 2. 56680932  |
| C | -0. 56476400 | -0. 14297209 | 0. 34200042  |
| H | -0. 87871167 | -1. 15708964 | 0. 55075831  |
| C | -1. 62041883 | 0. 77839250  | 0. 19658924  |
| C | -0. 22856481 | 2. 69824241  | 0. 63523271  |
| H | -0. 01953553 | 2. 34984444  | 1. 65262323  |
| H | -0. 44151549 | 3. 76798799  | 0. 66151391  |
| C | 0. 95783778  | 2. 44213436  | -0. 28773768 |
| H | 0. 65382028  | 2. 57965386  | -1. 33210901 |
| H | 1. 73844084  | 3. 17379924  | -0. 06331065 |
| C | -2. 99645317 | 0. 38671936  | 0. 08313404  |
| C | -4. 03475409 | 1. 34346005  | 0. 24010563  |
| H | -3. 77615547 | 2. 37167958  | 0. 46429932  |
| C | -5. 36099279 | 0. 99727375  | 0. 13737869  |
| H | -6. 11127157 | 1. 76366357  | 0. 28321254  |
| C | -5. 75303402 | -0. 34621459 | -0. 14332152 |
| C | -4. 71019583 | -1. 30635973 | -0. 31820635 |
| H | -4. 95137350 | -2. 33345894 | -0. 55989003 |
| C | -3. 38818549 | -0. 94639867 | -0. 20855083 |
| H | -2. 63749024 | -1. 70831261 | -0. 38995356 |
| C | -8. 11204116 | 0. 31053866  | -0. 09652525 |
| H | -8. 09492746 | 0. 76110577  | 0. 90303611  |
| H | -9. 08166126 | -0. 16517333 | -0. 23888062 |
| H | -8. 00835216 | 1. 10549712  | -0. 84412454 |
| C | -7. 43976396 | -2. 08391174 | -0. 51114302 |
| H | -7. 07430759 | -2. 41770960 | -1. 48993131 |
| H | -8. 52635890 | -2. 16194987 | -0. 50907060 |
| H | -7. 04865043 | -2. 75685463 | 0. 26053543  |
| N | 6. 82059022  | -0. 69935721 | -0. 21699182 |
| N | 1. 52270553  | 1. 11278954  | -0. 09091593 |
| N | -7. 05976521 | -0. 69618148 | -0. 24416695 |
| O | 6. 96396455  | -1. 89228472 | 0. 04277273  |
| O | 7. 72672117  | 0. 08425271  | -0. 48658586 |
| O | -1. 44052602 | 2. 10825126  | 0. 15855322  |

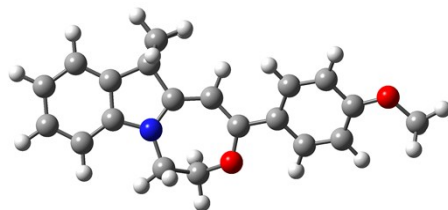

**2c**

|   |             |             |             |
|---|-------------|-------------|-------------|
| C | -3.67922024 | -0.77148786 | 0.03262510  |
| C | -4.96159897 | -1.30308027 | 0.02023044  |
| H | -5.13242352 | -2.35878543 | 0.21089876  |
| C | -6.04115643 | -0.45061069 | -0.24474613 |
| H | -7.04996448 | -0.85082215 | -0.25747409 |
| C | -5.83381060 | 0.90807319  | -0.49867841 |
| H | -6.68142968 | 1.55216233  | -0.71034463 |
| C | -4.54640432 | 1.45629181  | -0.49138922 |
| H | -4.39746998 | 2.50940700  | -0.70566562 |
| C | -3.49525474 | 0.58996539  | -0.21424623 |
| C | -1.38313992 | -0.22442771 | 0.12718142  |
| C | -2.33084255 | -1.42297785 | 0.27373975  |
| C | -2.02412884 | -2.50297187 | -0.79221674 |
| H | -2.76584384 | -3.30416382 | -0.72045004 |
| H | -1.03598687 | -2.94694899 | -0.63409795 |
| H | -2.06506681 | -2.09078236 | -1.80479765 |
| C | -2.22639014 | -2.02210094 | 1.69759631  |
| H | -2.44222743 | -1.27272118 | 2.46510828  |
| H | -1.22825761 | -2.43238376 | 1.88142470  |
| H | -2.95037402 | -2.83588847 | 1.80429783  |
| C | -1.55150434 | 2.21798027  | -0.30938660 |
| H | -2.34337946 | 2.93455969  | -0.07755543 |
| H | -1.24625432 | 2.37474989  | -1.35028135 |
| C | -0.37242221 | 2.47503509  | 0.62391464  |
| H | -0.17451196 | 3.54679158  | 0.67096907  |
| H | -0.58196914 | 2.10395446  | 1.63311159  |
| C | 1.03768706  | 0.58339742  | 0.13904621  |
| C | 0.00722383  | -0.35339088 | 0.24634674  |
| H | 0.33778430  | -1.37099283 | 0.40701699  |
| C | 2.43467332  | 0.20913583  | 0.02104116  |
| C | 2.82971270  | -1.08597360 | -0.39851852 |
| H | 2.08400935  | -1.82179897 | -0.68001180 |
| C | 4.16137129  | -1.42290254 | -0.50423322 |
| H | 4.47001946  | -2.40790665 | -0.83740110 |
| C | 5.16215478  | -0.47554017 | -0.19609758 |



|   |             |             |             |
|---|-------------|-------------|-------------|
| C | 4.79025906  | 0.81940063  | 0.21201712  |
| H | 5.54018131  | 1.56213705  | 0.45555487  |
| C | 3.44774892  | 1.14883202  | 0.31111462  |
| H | 3.17144235  | 2.14576666  | 0.63405364  |
| C | 7.50874766  | -0.01017972 | -0.05433174 |
| H | 7.48001397  | 0.85645969  | -0.72383656 |
| H | 8.41435266  | -0.58712556 | -0.23941067 |
| H | 7.48913487  | 0.32013979  | 0.99001855  |
| N | -2.10107907 | 0.87883481  | -0.13815855 |
| O | 0.85208639  | 1.91056355  | 0.14720237  |
| O | 6.42460641  | -0.90462066 | -0.32846140 |

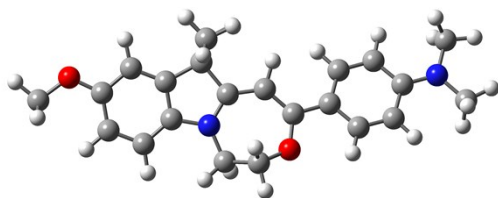

**2d**

|   |             |             |             |
|---|-------------|-------------|-------------|
| C | 3.31016555  | -0.67652687 | 0.11773626  |
| C | 4.57302173  | -1.23327197 | 0.12677856  |
| H | 4.74863980  | -2.28175517 | 0.34608019  |
| C | 5.68350659  | -0.41098221 | -0.16016731 |
| C | 5.49842134  | 0.94885825  | -0.45691137 |
| H | 6.34576075  | 1.58258382  | -0.68758828 |
| C | 4.21544617  | 1.50933887  | -0.46720309 |
| H | 4.09321584  | 2.55900835  | -0.71402023 |
| C | 3.14270347  | 0.68214558  | -0.16922075 |
| C | 1.95079954  | -1.30163401 | 0.37526670  |
| C | 1.83993522  | -1.85741033 | 1.81482582  |
| H | 2.06358680  | -1.08754121 | 2.55955068  |
| H | 2.55467499  | -2.67573690 | 1.94730456  |
| H | 0.83660258  | -2.24938201 | 2.01045607  |
| C | 1.63335631  | -2.40736826 | -0.65900931 |
| H | 0.63836096  | -2.83258872 | -0.49155188 |
| H | 2.36429894  | -3.21624165 | -0.56391022 |
| H | 1.68121873  | -2.02393028 | -1.68258772 |
| C | 1.01770361  | -0.09320818 | 0.19115769  |
| C | -0.37091244 | -0.20105500 | 0.31496020  |
| H | -0.71183408 | -1.20726675 | 0.52019099  |
| C | -1.39454624 | 0.74276010  | 0.16484668  |
| C | 0.03963273  | 2.62883042  | 0.59871519  |

|   |             |             |             |
|---|-------------|-------------|-------------|
| H | 0.22851738  | 2.27972000  | 1.61996346  |
| H | -0.14285989 | 3.70451650  | 0.61806066  |
| C | 1.23165905  | 2.33650508  | -0.30680488 |
| H | 0.94761028  | 2.48321137  | -1.35543997 |
| H | 2.03181132  | 3.04334669  | -0.07095273 |
| C | -2.78828554 | 0.39069316  | 0.06066682  |
| C | -3.21839317 | -0.92382205 | -0.24782648 |
| H | -2.48969888 | -1.70070792 | -0.45470667 |
| C | -4.55287061 | -1.24785007 | -0.34265925 |
| H | -4.82401245 | -2.26400391 | -0.59884677 |
| C | -5.56589789 | -0.26568451 | -0.13486973 |
| C | -5.13457121 | 1.06028032  | 0.15996163  |
| H | -5.86156171 | 1.84441960  | 0.32849824  |
| C | -3.79601684 | 1.37003798  | 0.24822551  |
| H | -3.50691719 | 2.38748819  | 0.48434269  |
| C | -7.30470014 | -1.95233469 | -0.50282308 |
| H | -6.96838006 | -2.27939797 | -1.49473458 |
| H | -8.39276620 | -2.00503637 | -0.47901829 |
| H | -6.91461698 | -2.64981701 | 0.24777121  |
| C | -7.90660868 | 0.45066885  | -0.04103778 |
| H | -7.86103620 | 0.88911416  | 0.96337013  |
| H | -8.89164731 | 0.00375887  | -0.17184028 |
| H | -7.79553607 | 1.25351127  | -0.77968956 |
| N | 1.75526979  | 0.99266401  | -0.10369135 |
| N | -6.88637209 | -0.58098958 | -0.21947826 |
| O | -1.18123568 | 2.07035403  | 0.11180860  |
| O | 6.88370085  | -1.03485598 | -0.12691664 |
| C | 8.06280534  | -0.28169740 | -0.40273380 |
| H | 8.88978968  | -0.98592442 | -0.30940246 |
| H | 8.04428663  | 0.12703993  | -1.42031662 |
| H | 8.19236365  | 0.53226785  | 0.32082361  |

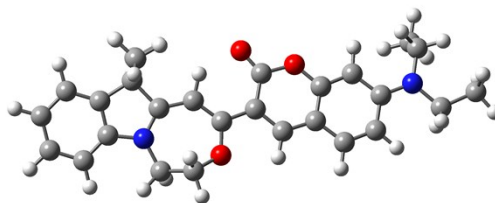

**2e**

|   |            |             |             |
|---|------------|-------------|-------------|
| C | 5.74676316 | -0.76340985 | -0.04014029 |
| C | 7.01893199 | -1.31586550 | -0.09754536 |

|   |              |              |              |
|---|--------------|--------------|--------------|
| H | 7. 18327085  | -2. 36565030 | 0. 12833452  |
| C | 8. 09583648  | -0. 49416242 | -0. 45490936 |
| C | 7. 89560634  | 0. 85595237  | -0. 75544835 |
| H | 8. 74036167  | 1. 47621102  | -1. 03824428 |
| C | 6. 61850600  | 1. 42557181  | -0. 70404211 |
| H | 6. 47347858  | 2. 47141656  | -0. 95405072 |
| C | 5. 57001828  | 0. 59020149  | -0. 33522597 |
| C | 3. 46853273  | -0. 17267493 | 0. 15840484  |
| C | 4. 40314348  | -1. 38103160 | 0. 29530993  |
| C | 4. 01358123  | -2. 48435890 | -0. 72058895 |
| H | 4. 02998644  | -2. 10536399 | -1. 74691290 |
| H | 3. 01496116  | -2. 87938627 | -0. 51051279 |
| H | 4. 72913173  | -3. 30948172 | -0. 65048449 |
| C | 4. 36284520  | -1. 93950490 | 1. 73823314  |
| H | 5. 07717116  | -2. 76374463 | 1. 83022252  |
| H | 3. 36795861  | -2. 32526234 | 1. 98094940  |
| H | 4. 63079665  | -1. 17386299 | 2. 47286552  |
| C | 2. 08858370  | -0. 28920179 | 0. 35788366  |
| H | 1. 74389137  | -1. 29510907 | 0. 55129872  |
| C | 1. 05683033  | 0. 64045594  | 0. 24028684  |
| C | 2. 48962970  | 2. 55317817  | 0. 52769326  |
| H | 2. 71918758  | 2. 24029989  | 1. 55236192  |
| H | 2. 29896403  | 3. 62766919  | 0. 51830668  |
| C | 3. 65229312  | 2. 24445814  | -0. 40902891 |
| H | 3. 33494448  | 2. 36580489  | -1. 45123213 |
| H | 4. 45545790  | 2. 96042891  | -0. 21427960 |
| N | 4. 18868150  | 0. 90718476  | -0. 19585607 |
| O | 1. 25568739  | 1. 96930610  | 0. 10814378  |
| C | -0. 34683062 | 0. 29145211  | 0. 23566482  |
| C | -1. 31600576 | 1. 29359970  | 0. 21425082  |
| C | -0. 78301827 | -1. 11484696 | 0. 22851856  |
| C | -2. 68535507 | 1. 01119376  | 0. 17190476  |
| H | -0. 99574852 | 2. 33000621  | 0. 22918362  |
| C | -3. 09090690 | -0. 34828076 | 0. 15122077  |
| C | -3. 71695887 | 1. 98719670  | 0. 13704236  |
| C | -4. 41283580 | -0. 73269593 | 0. 10279924  |
| C | -5. 03910567 | 1. 63206539  | 0. 08964396  |
| H | -3. 44313315 | 3. 03874135  | 0. 14266626  |
| C | -5. 44272390 | 0. 24931844  | 0. 08352780  |
| H | -4. 62289752 | -1. 79222307 | 0. 07464597  |
| H | -5. 78266789 | 2. 41535479  | 0. 05270849  |
| O | -0. 08910152 | -2. 10738192 | 0. 26491427  |
| O | -2. 15397252 | -1. 33609520 | 0. 17689148  |
| N | -6. 75946628 | -0. 09499363 | 0. 06448241  |
| C | -7. 78425131 | 0. 97201826  | -0. 03682638 |

|   |             |             |             |
|---|-------------|-------------|-------------|
| H | -7.60012631 | 1.69091608  | 0.76912254  |
| H | -7.64284536 | 1.50811445  | -0.98518379 |
| C | -7.16128808 | -1.50742799 | -0.03382947 |
| H | -6.51920341 | -2.09548580 | 0.62702325  |
| H | -8.16515362 | -1.59755426 | 0.37883048  |
| H | 9.09647939  | -0.91197115 | -0.50337011 |
| C | -7.13046827 | -2.06042193 | -1.46331059 |
| H | -6.12961756 | -1.99388811 | -1.90133270 |
| H | -7.43286613 | -3.11311966 | -1.46119243 |
| H | -7.82005930 | -1.51162759 | -2.11317721 |
| C | -9.23679936 | 0.51397583  | 0.06418139  |
| H | -9.45858310 | 0.04322104  | 1.02689017  |
| H | -9.87127240 | 1.40211905  | -0.01914733 |
| H | -9.52460415 | -0.16906993 | -0.74029248 |

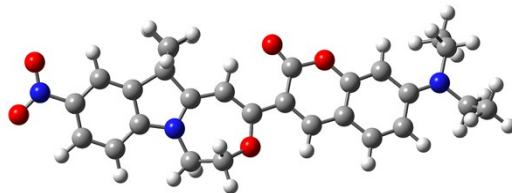

## 2f

|   |            |             |             |
|---|------------|-------------|-------------|
| C | 4.87495500 | -0.48698432 | 0.11121404  |
| C | 6.16228806 | -0.99511698 | 0.09972223  |
| H | 6.39475531 | -2.02115185 | 0.35941511  |
| C | 7.19525920 | -0.12714873 | -0.26758660 |
| C | 6.97432717 | 1.20270880  | -0.62174367 |
| H | 7.81807145 | 1.81989741  | -0.90432380 |
| C | 5.67576467 | 1.71464180  | -0.61161097 |
| H | 5.49787348 | 2.74470555  | -0.90027455 |
| C | 4.65100879 | 0.85087500  | -0.23336455 |
| C | 2.57428867 | 0.01862208  | 0.24609978  |
| C | 3.55147162 | -1.14745011 | 0.44305708  |
| C | 3.22865843 | -2.30015450 | -0.54115836 |
| H | 3.25033450 | -1.95690057 | -1.57987593 |
| H | 2.24194970 | -2.72580859 | -0.33555789 |
| H | 3.97373539 | -3.09370162 | -0.42788216 |
| C | 3.50798498 | -1.65749231 | 1.90397709  |
| H | 4.25377312 | -2.44726259 | 2.03774975  |
| H | 2.52521282 | -2.07646991 | 2.14019360  |
| H | 3.72787465 | -0.85667223 | 2.61667360  |
| C | 1.20148745 | -0.14328545 | 0.41816698  |

|   |               |              |              |
|---|---------------|--------------|--------------|
| H | 0. 89051434   | -1. 15467677 | 0. 63848379  |
| C | 0. 13251239   | 0. 74279383  | 0. 24255965  |
| C | 1. 48707327   | 2. 71687906  | 0. 50682390  |
| H | 1. 70801352   | 2. 44333745  | 1. 54442397  |
| H | 1. 25462637   | 3. 78207183  | 0. 46157828  |
| C | 2. 67743807   | 2. 42627842  | -0. 40042958 |
| H | 2. 37280327   | 2. 49829099  | -1. 45102014 |
| H | 3. 44582060   | 3. 18240030  | -0. 21776999 |
| N | 8. 57643531   | -0. 64415639 | -0. 28569815 |
| N | 3. 26381937   | 1. 11951756  | -0. 13102921 |
| O | 8. 74004702   | -1. 82029977 | 0. 03158405  |
| O | 9. 46754191   | 0. 13415690  | -0. 61520199 |
| O | 0. 28441692   | 2. 07292449  | 0. 08140866  |
| C | -1. 24915882  | 0. 33446073  | 0. 20413803  |
| C | -2. 26172970  | 1. 29546835  | 0. 12701476  |
| C | -1. 62546763  | -1. 08905921 | 0. 21961979  |
| C | -3. 61202284  | 0. 95389616  | 0. 04829102  |
| H | -1. 98591175  | 2. 34464322  | 0. 12633438  |
| C | -3. 96017394  | -0. 42403074 | 0. 05143416  |
| C | -4. 68322420  | 1. 88720756  | -0. 03778415 |
| C | -5. 26217654  | -0. 86372694 | -0. 02923663 |
| C | -5. 98504279  | 1. 47658079  | -0. 11967725 |
| H | -4. 45291078  | 2. 94902950  | -0. 03219829 |
| C | -6. 32741078  | 0. 07625877  | -0. 12000671 |
| H | -5. 43420261  | -1. 93079339 | -0. 04255316 |
| H | -6. 76503910  | 2. 22438436  | -0. 16235238 |
| O | -0. 89343833  | -2. 05022876 | 0. 30191973  |
| O | -2. 98476364  | -1. 36917865 | 0. 13202666  |
| N | -7. 61860735  | -0. 32786079 | -0. 20011394 |
| C | -8. 73301627  | 0. 61401163  | -0. 40412527 |
| H | -9. 50845287  | 0. 06783163  | -0. 94967967 |
| H | -8. 40831824  | 1. 41795290  | -1. 06941461 |
| C | -8. 00240553  | -1. 74601848 | -0. 09259240 |
| H | -7. 35419076  | -2. 23681517 | 0. 63805825  |
| H | -9. 00966849  | -1. 76750816 | 0. 33418327  |
| C | -9. 30511101  | 1. 17236241  | 0. 90239879  |
| H | -8. 55439180  | 1. 74306151  | 1. 45813808  |
| H | -10. 14982395 | 1. 83482589  | 0. 68618087  |
| H | -9. 66541997  | 0. 36737674  | 1. 55149719  |
| C | -7. 98376283  | -2. 48467117 | -1. 43456008 |
| H | -6. 98135628  | -2. 49599115 | -1. 87372721 |
| H | -8. 30759327  | -3. 52106248 | -1. 29297055 |
| H | -8. 66293055  | -2. 01392978 | -2. 15316402 |

## 29. References

- S1 Q. Chen, L. Sheng, J. Du, G. Xi, S. X.-A. Zhang, *Chem. Commun.* 2018, **54**, 5094-5097.
- S2 Gaussian 09, Revision D.01, M. J. Frisch, G. W. Trucks, H. B. Schlegel, G. E. Scuseria, M. A. Robb, J. R. Cheeseman, G. Scalmani, V. Barone, B. Mennucci, G. A. Petersson, H. Nakatsuji, M. Caricato, X. Li, H. P. Hratchian, A. F. Izmaylov, J. Bloino, G. Zheng, J. L. Sonnenberg, M. Hada, M. Ehara, K. Toyota, R. Fukuda, J. Hasegawa, M. Ishida, T. Nakajima, Y. Honda, O. Kitao, H. Nakai, T. Vreven, J. A. Montgomery, Jr., J. E. Peralta, F. Ogliaro, M. Bearpark, J. J. Heyd, E. Brothers, K. N. Kudin, V. N. Staroverov, T. Keith, R. Kobayashi, J. Normand, K. Raghavachari, A. Rendell, J. C. Burant, S. S. Iyengar, J. Tomasi, M. Cossi, N. Rega, J. M. Millam, M. Klene, J. E. Knox, J. B. Cross, V. Bakken, C. Adamo, J. Jaramillo, R. Gomperts, R. E. Stratmann, O. Yazyev, A. J. Austin, R. Cammi, C. Pomelli, J. W. Ochterski, R. L. Martin, K. Morokuma, V. G. Zakrzewski, G. A. Voth, P. Salvador, J. J. Dannenberg, S. Dapprich, A. D. Daniels, O. Farkas, J. B. Foresman, J. V. Ortiz, J. Cioslowski, and D. J. Fox, Gaussian, Inc., Wallingford CT, **2013**
